# Supplementary material for: Substandard and falsified medicines in the UK: a retrospective review of drug alerts (2001–2011)
Source: PubMed Central journal article supplement — BMJ Open. 2013 Jul 23;3(7):e002924. doi: 10.1136/bmjopen-2013-002924 (PMC3731779; doi:10.1136/bmjopen-2013-002924), 2013-07-23
Supplement: bmjopen-2013-002924.draft_revisions.pdf [file bmjopen-2013-002924.draft_revisions.pdf]

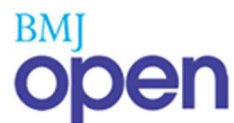

**Counterfeit and substandard medicines in the UK: A retrospective review of drug alerts (2001–2011)**

|                                 |                                                                                                                                                                                                                                             |
|---------------------------------|---------------------------------------------------------------------------------------------------------------------------------------------------------------------------------------------------------------------------------------------|
| Journal:                        | <i>BMJ Open</i>                                                                                                                                                                                                                             |
| Manuscript ID:                  | bmjopen-2013-002924                                                                                                                                                                                                                         |
| Article Type:                   | Research                                                                                                                                                                                                                                    |
| Date Submitted by the Author:   | 27-Mar-2013                                                                                                                                                                                                                                 |
| Complete List of Authors:       | Almuzaini, Tariq; University of Nottingham, Academic Division of Child Health<br>Sammons, Helen; University of Nottingham, Academic Division of Child Health<br>Choonara, Imti; University of Nottingham, Academic Division of Child Health |
| <b>Primary Subject Heading</b>: | Health policy                                                                                                                                                                                                                               |
| Secondary Subject Heading:      | Public health, Pharmacology and therapeutics                                                                                                                                                                                                |
| Keywords:                       | Counterfeit , Substandard, Defective, Medicines                                                                                                                                                                                             |
|                                 |                                                                                                                                                                                                                                             |

SCHOLARONE™  
Manuscripts

1  
2  
3  
4  
5 **Counterfeit and substandard medicines in the UK: A retrospective**  
6 **review of drug alerts (2001–2011)**  
7  
8  
9

10  
11  
12 Tariq Almuzaini<sup>1</sup>, Helen Sammons<sup>1</sup>, Imti Choonara<sup>1</sup>

13  
14 (1) Academic Division of Child Health, University of Nottingham, Derbyshire  
15 Children's Hospital, Derby, UK  
16

17  
18  
19 **Corresponding author**

20  
21 Tariq Almuzaini

22  
23 Academic Division of Child Health

24  
25 The Medical School

26  
27 University of Nottingham

28  
29 Derbyshire Children's Hospital

30  
31 Uttoxeter Road

32  
33 Derby DE22 3DT

34  
35 UK

36  
37 Email: [mzxta@exmail.nottingham.ac.uk](mailto:mzxta@exmail.nottingham.ac.uk)  
38  
39  
40  
41

42 **Abstract:** 186 words

43 **Full text:** 2688 words

44 **Number of figures:** 2

45 **Number of box:** 1

46 **Number of tables:** 5  
47  
48  
49  
50  
51  
52  
53

54 **Keywords:** Counterfeit, substandard, defective, medicines  
55  
56  
57  
58  
59  
60

## ABSTRACT

**Objective:** To determine the extent of counterfeit and substandard medicines in the UK.

**Design:** A retrospective review of drug alerts and company-led recalls.

**Setting:** The Medicines and Healthcare Products Regulatory Agency (MHRA) website search for drug alerts issued between 2001 and 2011.

**Eligibility criteria:** Drug alerts related to quality defect in medicinal products.

**Main outcome measure:** Relevant data about defective medicines reported in drug alerts and company-led recalls, including description of the defect, type of formulation, year of the alert and category of the alert.

**Results:** There were 280 substandard medicines of which 222 were recalled. The two most frequent problems were contamination (74 incidents) and issues related to packaging (98 incidents). Formulations for parenteral administration (117 incidents) were the formulation most frequently affected. There were 11 counterfeit medicines reported over the 11 year period. The number of defective medicines reported by the MHRA increased tenfold from five in 2001 to 50 in 2011.

**Conclusions:** Substandard medicines are a significant problem in the UK. It is uncertain whether the increasing number of reports relates to improved detection or an increase in the number of substandard medicines.

### Article summary

#### Article focus

- To describe the pattern of drug alerts issued by the MHRA in the UK from 2001 to 2011.
- To determine the extent of substandard and counterfeit medicines in the UK.

## Key messages

- Substandard medicines are a significant problem in the UK, with a tenfold increase in the incidents reported over the last 10 years.
- Formulations for parenteral administration were most likely to be substandard.
- Education of healthcare professionals in the initial assessment of quality of medicines, especially parenteral formulation, is needed.

## Strengths and limitations of this study

### Strengths

- This is the first review to assess the problem of counterfeit and substandard medicines in a high income country.
- Quantification of all drug alerts issued by the MHRA over an 11-year period.

### Limitations

- Clinical significance of the problem is unknown due to the lack of available data on the adverse events related to defective medicines, as not reported by the MHRA or the manufacturers.
- We were not able to determine the reason(s) for the rise of drug alerts, owing to the limited data available.

## INTRODUCTION

Counterfeit and substandard medicines are a significant problem throughout the world.<sup>1-4</sup> Most of the evidence for this is found in Africa and Asia in low and lower middle income countries.<sup>1-3</sup> Little evidence, however, is available for European and Northern American countries, as no individual studies about the problem have been published in high income countries. According to European commission data, the incidence of this problem in the European supply chain is growing by 10% to 20% annually.<sup>5, 6</sup>

In the UK, the Medicines and Healthcare products Regulatory Agency (MHRA) has the responsibility of safeguarding the public from the risk of these drugs. The

1  
2  
3 MHRA's Defective Medicines Report Centre (DMRC) is the department responsible  
4 for receiving and assessing reports about suspected defective drugs. Drug alerts are  
5 issued by the DMRC to the manufacturer, wholesalers and healthcare providers, in  
6 cases where a defective medicine is shown to compromise patients' safety.<sup>7</sup>  
7  
8  
9

10  
11 The aims of this study were to describe the number of drug alerts issued by the  
12 MHRA and to determine the extent of substandard and counterfeit medicines in the  
13 UK.  
14  
15  
16

## 17 18 **METHODS**

19 The DMRC defines a defective drug as a "drug which proves to be harmful under  
20 normal conditions of use, lacking in therapeutic efficacy and/or the qualitative and  
21 quantitative composition of a drug is not as declared. A drug can also be defective if  
22 the controls on a drug and/or on the ingredients and the controls at an intermediate  
23 stage of the manufacturing process have not been carried out or if some other  
24 requirement or obligation relating to the grant of the manufacturing authorisation has  
25 not been fulfilled."<sup>8</sup> This combines two different types of defects (i.e., counterfeit and  
26 substandard medicines) under one broad definition. The WHO definition of  
27 counterfeit and substandard medicines was used in this case in order to differentiate  
28 between both types of quality defects (Box 1).<sup>9,10</sup> Therefore, whenever the term  
29 'defective medicine' is used in this paper it means either counterfeit or substandard  
30 medicines.  
31  
32  
33  
34  
35  
36  
37  
38  
39  
40

41 A search for drug alerts related to defective medicinal products was carried out. This  
42 was performed through the official MHRA website using the section allocated for  
43 drug alerts. The first drug alert reported on the MHRA website was in the year 2001;  
44 thus, all drug alerts issued between 2001 and 2011 were included. Manufacturers  
45 can also voluntarily recall their defective products without the need for a drug alert to  
46 be issued by the MHRA in cases where defective medicines have left manufacturing  
47 sites but have had limited distribution in the supply chain. The MHRA started posting  
48 these recalls under its company-led recall section in 2011; hence, all these recalls  
49 were included. The resulting alerts and recalls were compiled and exclusion criteria  
50 included the following: drug alert replaced by another updated one, drug alert  
51  
52  
53  
54  
55  
56  
57  
58  
59  
60

1  
2  
3 duplication, alert about clarification of medicine information, medical device alert and  
4 alert about medicines lacking efficacy or having significant toxicity.  
5  
6

7  
8 The following data was extracted from these alerts: name, strength and dosage form;  
9 year of the alert; number of affected batches; nature of the defect; class of drug alert  
10 and action to be taken about defective medicine. The types of defect were classified  
11 as counterfeit or substandard defects. Substandard medicines were then subdivided  
12 according to the type of the defect into the following:  
13  
14  
15

- 16  
17  
18 ➤ **Contamination:** Defect related to microbial contaminations and issues  
19 related to sterility as well as chemical and particulate (i.e. impurities)  
20 contamination.  
21
- 22  
23 ➤ **Minor packaging defect:** Defects that occur in relation to the printing of  
24 packaging materials, for instance, printed box errors that involve a missing  
25 or incorrect expiry date or batch number of a medicine. This also includes  
26 any errors in the patients' information leaflets (PIL) or summary of product  
27 characteristic.  
28
- 29  
30 ➤ **Major packaging defects:** A defect that involves packing a medicine in a  
31 wrong box or carton or printing errors that involve missing or incorrect  
32 name or strength of a medicine.  
33
- 34  
35 ➤ **Delivery:** A technical or physical defect such as broken capsules or  
36 leaking containers.  
37
- 38  
39 ➤ **Stability failure:** Defect results from the failure of the medicine to remain  
40 within the established standards throughout the expiration period, for  
41 example, low assay of the active ingredient prior to a product expiry.  
42
- 43  
44 ➤ **Potency:** Failure of the medicine to evoke the desired effect within the  
45 stated strength.  
46
- 47  
48 ➤ **Defect in active ingredient:** Defect results from the active ingredient  
49 being inadequate or excessive in the formulation.  
50
- 51  
52 ➤ **Other defects:** Other deviations concerning non-compliance with good  
53 manufacturing practice at manufacturing site.  
54  
55

56 The total number of alerts was obtained and each individual medicine reported in  
57 these alerts was then extracted.  
58  
59  
60

1  
2  
3  
4  
5  
6  
7  
8  
9  
10  
11  
12  
13  
14  
15  
16  
17  
18  
19  
20  
21  
22  
23  
24  
25  
26  
27  
28  
29  
30  
31  
32  
33  
34  
35  
36  
37  
38  
39  
40  
41  
42  
43  
44  
45  
46  
47  
48  
49  
50  
51  
52  
53  
54  
55  
56  
57  
58  
59  
60

Company-led recalls are initiated by manufacturers after consultation with the MHRA, without giving the recall any degree of urgency. Drug alerts, by contrast, are issued by the MHRA and have four possible classifications based on the level of the risk.<sup>8</sup> These classes are as follows:

- **Class 1 drug alert:** The defect in a medicine is life-threatening and poses a serious risk to patient health
- **Class 2 drug alert:** The defect in a medicine is not life-threatening but can still be harmful to patients
- **Class 3 drug alert:** The defect in a medicine is unlikely to be hazardous to patients, but an alert is issued, due to problems related to non-compliance with good manufacturing practices or marketing authorisations
- **Class 4 drug alert:** The least critical alert; advises “caution in use”.

Class 1, 2 and 3 drug alerts require recalls of affected batches, whereas class 4 alerts do not require recalls but require caution in dealing with defective medicines.<sup>8</sup>

## RESULTS

### Incident trends

There were a total of 244 drug alerts issued by the MHRA. After applying the aforementioned exclusion criteria, 30 were excluded. In turn, 214 were deemed suitable for inclusion (Figure 1). Analysis showed that these alerts reported 269 medicines, each of which represented an individual incident. The majority of these alerts were issued for individual medicines. However, some were issued for up to 14 medicines.

Since MHRA started reporting drug alerts online in 2001, there has been a gradual increase in the rate of drug alerts related to defective medicinal products. The number of drug alerts increased from five in 2001 to 31 in 2011. The number of

1  
2  
3 defective medicines reported by these alerts was five in 2001. This figure increased  
4 tenfold by 2011, to a total of 50 (Figure 2).  
5  
6  
7

### 8 **Defective medicines recalled by the MHRA under class 1, 2, 3, 4 drug alerts**

9  
10 Twenty-one medicines were recalled under class 1 drug alerts. The highest number of  
11 alerts was issued for contamination reasons. The most frequent formulations reported  
12 were formulations for parenteral administration, which accounted for seven cases.  
13 The median time, when stated, taken by the MHRA to identify these medicines as  
14 defective from medicines being available on the market to issuing alerts was 56 days  
15 (range 13-242 days). The length of this time period is critical, as the chance of  
16 adverse events increases as the time of exposure increases. Details of these alerts  
17 are shown in Table 1.  
18  
19

20 Under a class 2 alert, 161 medicines were recalled. The main issues were related to  
21 contamination and minor packaging defects. There were also 87 medicines recalled  
22 under class 3 or 4 alerts (Table 2).  
23  
24  
25  
26  
27  
28

### 29 **Defective medicines recalled by Manufacturers (Company-led recalls)**

30  
31 It was observed that 19 company-led recalls were issued by the manufacturers in  
32 2011. One recall was excluded after applying the exclusion criteria. Thus, 18  
33 company-led recalls were included and these were issued for a total of 22 defective  
34 medicines (Figure 1).  
35  
36  
37  
38  
39

### 40 **Defective medicines, classified by type of defect**

41  
42 The incidents of defective medicines reported by the MHRA (269) were compiled  
43 with those reported by the manufacturers (22), which resulted in 291 incidents to be  
44 considered for further analysis.  
45

46 Defects in substandard medicines accounted for the bulk of these incidents. Two  
47 hundred and eighty medicines (96%) were reported to be substandard (Figure 1).  
48 The two most frequent problems, with the substandard medicines, were packaging  
49 and contamination (Table 3). A total of 222 medicines were recalled. The  
50 formulation most frequently affected by quality issues was formulations for parenteral  
51 administration. These accounted for 117 incidents (42%) (Table 4).  
52  
53  
54

55 Since 2004, 11 incidents of counterfeit drugs have been reported by the MHRA (Table  
56 5). The last of these was reported in 2009. Information regarding the actual problems  
57  
58  
59  
60



1  
2  
3 with the counterfeit medicines, however, is available for only two of the 11 incidents  
4 reported.  
5  
6

## 7 8 **DISCUSSION**

9  
10 This review has shown that the problem of defective medicines reported in the UK  
11 has increased tenfold over the eleven years studied. It is likely that the incidence of  
12 defective medicines has actually increased in the UK, but there is insufficient data to  
13 prove this. The most frequent formulations reported to be defective were the  
14 formulations for parenteral administration, which accounted for 42% of cases.  
15 Substandard medicines represented the bulk of defective medicine incidents,  
16 accounting for over 95% of the cases. Contamination issues were the most  
17 frequently reported clinically relevant problems reported; 80% of these contaminated  
18 formulations were formulations for parenteral administration. There is a greater  
19 likelihood of harm to the patient in association with contaminated parenteral  
20 formulations as highlighted by the recent outbreak of fungal sepsis in the USA.<sup>11</sup>  
21 However, these adverse health consequences have not been documented by the  
22 MHRA or the manufacturers.  
23  
24  
25  
26  
27  
28  
29  
30  
31  
32

33 The majority of counterfeit medicine incidents were reported by the MHRA in the  
34 period between 2004 and 2007. Information regarding the actual quality-defect type  
35 beyond authenticity has been stated for only two cases. Information on the other  
36 nine cases has been requested from the MHRA but has not been provided. Five  
37 incidents of counterfeit drugs were reported in 2007 alone. This led the MHRA to  
38 introduce its first anti-counterfeiting strategy in 2007.<sup>12</sup> The strategy outlined a 3-  
39 year plan to combat counterfeit medicines through a visionary program of  
40 communication, collaboration, and regulation. Since then, the MHRA has reported  
41 only one incident in 2009. This may be attributed to the effectiveness of this strategy  
42 in reducing the availability of these drugs in UK supply chains. However, according  
43 to the latest European Union customs data, the number of counterfeit  
44 pharmaceuticals seized increased from 148 cases in 2005 to 3242 cases in 2009,  
45 before declining to 1812 cases in 2010.<sup>13-18</sup> The question that should be raised is  
46 how many counterfeit drugs successfully passed in to European markets? Individual  
47 data about these seizures in the UK have been requested but was not provided  
48 either by European or UK customs.  
49  
50  
51  
52  
53  
54  
55  
56  
57  
58  
59  
60

1  
2  
3  
4  
5 It is not clear whether the increase in the trend of substandard medicines incidents  
6 resulted from new legislation or strategies by the MHRA, that have made it easier to  
7 detect and report these drugs, or whether the rate of manufacture of substandard  
8 medicines in the UK is increasing. The overall performance of the MHRA has  
9 improved since it was officially launched in 2003.<sup>19,20</sup> The introduction and  
10 development of the MHRA's website since 2003/04, as well as the addition of an  
11 integrated site for medicines and medical devices, opened important communication  
12 channels with healthcare providers and stakeholders.<sup>19</sup> The MHRA has introduced  
13 guidelines to healthcare professionals outlining procedures for reporting medicines  
14 suspected to be defective.<sup>8</sup> These guidelines outline the role that healthcare  
15 professionals play in the initial assessment of suspected defected medicines. They  
16 also illustrate subsequent investigations that can be carried out by the DMRC before  
17 it issues a drug alert. The ease of access to these guidelines through the MHRA's  
18 website may increase healthcare providers' awareness about how to deal with these  
19 drugs. It is now possible to report these drugs online or over the phone if the  
20 healthcare professional thinks that the defect in a drug may represent a serious risk  
21 to public health.  
22  
23  
24  
25  
26  
27  
28  
29  
30  
31  
32  
33

34  
35 These developments may facilitate the reporting of defective drugs by health care  
36 providers or by manufacturers. In 2003/04, the DMRC received 298 reports about  
37 defective medicines.<sup>19</sup> The number of these reports has increased, totaling 830 in  
38 2010/11.<sup>20</sup> However the level of awareness of healthcare professionals about these  
39 drugs and how to report them has not been tested. For this reason, the possibility  
40 cannot be excluded that both the real incidence and the rate of manufacturing of  
41 poor quality medicines are increasing.  
42  
43  
44  
45  
46  
47

48 Events caused by defective medicines are sometimes relatively difficult to distinguish  
49 from those considered to be the result of accidents, errors, or adverse drug reactions.  
50 An example is the fentanyl transdermal patch. Fentanyl is a strong opioid analgesic  
51 (about 80 times stronger than morphine) used to treat chronic pain.<sup>21</sup> It has a narrow  
52 therapeutic window, and an overdose can result in adverse effects, including  
53 respiratory arrest and death. Several deaths due to fentanyl patch overdose have  
54 been reported worldwide,<sup>22</sup> including the UK.<sup>23</sup> Overdoses can be caused by  
55  
56  
57  
58  
59  
60

1  
2  
3 excessive application of patches, incorrect product use (e.g., cutting the patch), and  
4 exposing the patches or the skin to any kind of heat, which can dramatically increase  
5 the drug's absorption through the skin.<sup>22</sup> Certain fentanyl patches and transdermal  
6 systems have been recalled in different countries,<sup>24, 25</sup> including the UK (Table 1).  
7  
8 The defects in all cases resulted from either a cut in one side of the fentanyl patch  
9 reservoir or self-activation of the transdermal system; both have the potential to  
10 cause overdose. In such cases, it can be difficult to distinguish between the events  
11 related to adverse drug reaction, misuse, or accidents, and those that are caused by  
12 defective products. There is a possibility, therefore, that some cases of adverse  
13 events related to this defect have been attributed to the adverse-reaction nature of  
14 the drug and have gone unreported.  
15  
16  
17  
18  
19  
20  
21  
22

23 It was of concern that parenteral formulations for intravenous injection or infusion  
24 were the formulation most likely to be substandard. The risk of drug toxicity is far  
25 greater with drugs given intravenously than those given orally. The toxicity  
26 associated with substandard medicines worldwide is unknown.<sup>26</sup> Healthcare  
27 professionals should therefore be aware of the expected risk. Healthcare providers  
28 should be educated in the initial assessment of medicines, especially parenteral  
29 formulations, for any sign of impurity, particulate contamination, or improper sealing.  
30 If anything appears suspicious, the healthcare providers should know how to report  
31 this defect immediately to the DMRC before any further harm can occur.  
32  
33  
34  
35  
36  
37  
38  
39

40 The main limitation of the review was the lack of available data on the adverse  
41 events related to defective medicines. The data has been not provided by the MHRA  
42 or the manufacturers. Thus, the clinical significance of the problem is unknown.  
43 Company-led recalls have been posted on the MHRA website since 2011;  
44 information on these recalls for previous years has not been provided. Due to the  
45 lack of information made available, we were not able to determine the reason(s) for  
46 the rise in defective medicines. The WHO has recently proposed a new single  
47 definition for counterfeit and substandard medicines,<sup>27</sup> the definitions used in this  
48 paper are the previous 1992 WHO definitions (box 1). This new definition however  
49 has been questioned recently by various groups,<sup>4</sup> who feel it does not distinguish  
50 sufficiently between the different categories that require different monitoring and  
51 solutions. We have therefore used the older more widely used definition.  
52  
53  
54  
55  
56  
57  
58  
59  
60

## CONCLUSION

The reporting of substandard medicines in the UK is on the rise. There was an increase from five incidents in 2001 to 50 incidents in 2011. Parenteral formulations were most likely to be substandard. There is a greater likelihood of harm to the patient in association with contaminated parenteral formulations, but the clinical significance of the problem is unknown, due to the lack of information related to their toxicity. Healthcare providers should know how to assess the quality of medicines, particularly parenteral formulations for any sign that can be an indication of contamination and sterility failure.

### Contributors:

TA performed the search, extracted the data and drafted the paper. HS double-checked the extracted data, conceived the idea and interpreted the results. IC had the original idea for the study. IC and TA designed the review and IC critically revised the manuscript and supervised the study. All authors approve of this final submitted version after their revision of the manuscript.

**Competing interests:** None.

**Funding:** This research received no specific grant from any funding agency in the public, commercial or not-for-profit sectors.

**Ethical approval:** Not required.

**Data sharing:** No additional data available.

## References

1. Dondorp AM, Newton PN, Mayxay M, *et al.* Fake antimalarials in Southeast Asia are a major impediment to malaria control: multinational cross-sectional survey on the prevalence of fake antimalarials. *Trop Med Int Health* 2004;**9**:124-1246.
2. Bate R, Coticelli P, Tren R, *et al.* Antimalarial drug quality in the most severely malarious parts of Africa – a six country study. *PLoS One* 2008;**3**:e2132.
3. Caudron JM, Ford N, Henkens M, *et al.* Substandard medicines in resource-poor settings: a problem that can no longer be ignored. *Trop Med Int Health* 2008;**13**(8):1062-1072.
4. Attaran A, Barry D, Basheer S, *et al.* How to achieve international action on falsified and substandard medicines. *BMJ* 2012;**345**:e7381.
5. European Commission. Policies to Combat Counterfeit Medicines, Contribution to Impact Assessment - 2008, London, [http://ec.europa.eu/health/files/counterf\\_par\\_trade/counterfeit-study-main-report\\_en.pdf](http://ec.europa.eu/health/files/counterf_par_trade/counterfeit-study-main-report_en.pdf) Accessed 30 January 2012.
6. Williams A. Europe prepares to battle the counterfeiters. *Pharmaceutical Technology Europe* 2011;**23**:9-11.
7. MHRA, Defective Medicines Report Centre (2011), <http://www.mhra.gov.uk/Safetyinformation/Howwemonitorthesafetyofproducts/Medicines/DefectiveMedicinesReportCentre/index.htm> Accessed 30 January 2012.
8. MHRA. A Guide to Defective Medicinal Products, <http://www.mhra.gov.uk/home/groups/is-lic/documents/publication/con007572.pdf> Accessed 30 January 2012.

- 1  
2  
3 9. WHO. Counterfeit drugs guidelines for the development of measures to  
4 combat counterfeit drugs. WHO/EDM/QSM/99.1. Geneva: WHO 1999,  
5 [http://whqlibdoc.who.int/hq/1999/WHO\\_EDM\\_QSM\\_99.1.pdf](http://whqlibdoc.who.int/hq/1999/WHO_EDM_QSM_99.1.pdf). Accessed 10  
6 April 2011.  
7  
8  
9  
10  
11  
12 10. WHO, What are substandard medicines?,  
13 <http://www.who.int/medicines/services/counterfeit/faqs/06/en/> Accessed 16  
14 April 2011.  
15  
16  
17  
18 11. Davies E. More US citizens die from meningitis as scope of inquiry widens.  
19 *BMJ* 2012;**345**:e7095.  
20  
21  
22 12. MHRA, Anti-counterfeiting strategy 2007-2010,  
23 <http://www.mhra.gov.uk/home/groups/ei/documents/websiteresources/con203>  
24 [3156.pdf](http://www.mhra.gov.uk/home/groups/ei/documents/websiteresources/con203) Accessed 15 April 2012.  
25  
26  
27  
28 13. European Commission. Community-wide statistics for 2005,  
29 [http://ec.europa.eu/taxation\\_customs/resources/documents/customs/customs](http://ec.europa.eu/taxation_customs/resources/documents/customs/customs)  
30 [controls/counterfeit\\_piracy/statistics/counterf\\_comm\\_2005\\_en.pdf](http://ec.europa.eu/taxation_customs/resources/documents/customs/customs) Accessed  
31 16 April 2012.  
32  
33  
34  
35 14. European Commission. Summary of Community Customs activities on  
36 Counterfeit and Piracy – Results at the European Border – 2006. Brussels,  
37 [http://ec.europa.eu/taxation\\_customs/resources/documents/customs/customs](http://ec.europa.eu/taxation_customs/resources/documents/customs/customs)  
38 [controls/counterfeit\\_piracy/statistics/counterf\\_comm\\_2006\\_en.pdf](http://ec.europa.eu/taxation_customs/resources/documents/customs/customs) Accessed  
39 16 April 2012.  
40  
41  
42  
43 15. European Commission. Report on Community Customs activities on  
44 Counterfeit and Piracy – Results at the European Border – 2007. Brussels,  
45 [http://ec.europa.eu/taxation\\_customs/resources/documents/customs/customs](http://ec.europa.eu/taxation_customs/resources/documents/customs/customs)  
46 [controls/counterfeit\\_piracy/statistics2007.pdf](http://ec.europa.eu/taxation_customs/resources/documents/customs/customs) Accessed 16 April 2012.  
47  
48  
49  
50  
51  
52  
53  
54  
55  
56  
57  
58  
59  
60

- 1  
2  
3 16. European Commission. Report on Community Customs activities on  
4 Counterfeit and Piracy – Results at the European Border – 2008, Brussels,  
5 [http://ec.europa.eu/taxation\\_customs/resources/documents/customs/customs](http://ec.europa.eu/taxation_customs/resources/documents/customs/customs_controls/counterfeit_piracy/statistics/2009_statistics_for_2008_full_report_en.pdf)  
6 [controls/counterfeit\\_piracy/statistics/2009\\_statistics\\_for\\_2008\\_full\\_report\\_en.](http://ec.europa.eu/taxation_customs/resources/documents/customs/customs_controls/counterfeit_piracy/statistics/2009_statistics_for_2008_full_report_en.pdf)  
7 [pdf](http://ec.europa.eu/taxation_customs/resources/documents/customs/customs_controls/counterfeit_piracy/statistics/2009_statistics_for_2008_full_report_en.pdf) Accessed 16 April 2012.  
8  
9  
10  
11  
12  
13  
14 17. European Commission. Report on Community Customs activities on  
15 Counterfeit and Piracy – Results at the European Border – 2009. Brussels,  
16 [http://ec.europa.eu/taxation\\_customs/resources/documents/customs/customs](http://ec.europa.eu/taxation_customs/resources/documents/customs/customs_controls/counterfeit_piracy/statistics/statistics_2009.pdf)  
17 [controls/counterfeit\\_piracy/statistics/statistics\\_2009.pdf](http://ec.europa.eu/taxation_customs/resources/documents/customs/customs_controls/counterfeit_piracy/statistics/statistics_2009.pdf) Accessed 16 April  
18  
19  
20  
21  
22 2012.  
23  
24  
25 18. European Commission. Report on Community Customs activities on  
26 Counterfeit and Piracy – Results at the European Border – 2010. Brussels,  
27 [http://ec.europa.eu/taxation\\_customs/resources/documents/customs/customs](http://ec.europa.eu/taxation_customs/resources/documents/customs/customs_controls/counterfeit_piracy/statistics/statistics_2010.pdf)  
28 [controls/counterfeit\\_piracy/statistics/statistics\\_2010.pdf](http://ec.europa.eu/taxation_customs/resources/documents/customs/customs_controls/counterfeit_piracy/statistics/statistics_2010.pdf) Accessed 16 April  
29  
30  
31  
32 2012.  
33  
34  
35  
36 19. MHRA, Annual Report and Accounts 2003/04,  
37 [http://www.mhra.gov.uk/home/groups/comms-](http://www.mhra.gov.uk/home/groups/comms-ic/documents/websiteresources/con008340.pdf)  
38 [ic/documents/websiteresources/con008340.pdf](http://www.mhra.gov.uk/home/groups/comms-ic/documents/websiteresources/con008340.pdf) Accessed 17 April 2012.  
39  
40  
41  
42  
43 20. MHRA, Annual statistics 2010/11,  
44 [http://www.mhra.gov.uk/home/groups/comms-](http://www.mhra.gov.uk/home/groups/comms-ic/documents/websiteresources/con123239.pdf)  
45 [ic/documents/websiteresources/con123239.pdf](http://www.mhra.gov.uk/home/groups/comms-ic/documents/websiteresources/con123239.pdf) Accessed 17 April 2012.  
46  
47  
48  
49 21. Käferstein H, Sticht G. Comparison of nonradioactive microtiter plate enzyme  
50 immunoassays for the sensitive detection of fentanyl. *Forensic Sci Int*  
51  
52 2000;**113**(1–3):353-357.  
53  
54  
55  
56  
57  
58  
59  
60

- 1  
2  
3 22. Jumbelic MI. Deaths with transdermal fentanyl patches. *Am J Forensic Med*  
4 *Pathol* 2010;**31**(1):18-21.  
5  
6  
7 23. MHRA. Fentanyl patches: serious and fatal overdose from dosing errors,  
8 accidental exposure, and inappropriate use. Drug Safety Update Sept 2008,  
9 vol 2 issue 2: 2,  
10 <http://www.mhra.gov.uk/Safetyinformation/DrugSafetyUpdate/CON087796>  
11  
12 Accessed 1 May 2011.  
13  
14 24. FDA. Duragesic (fentanyl transdermal system), class 1 recall notice. 2004,  
15 <http://www.fda.gov/Safety/MedWatch/SafetyInformation/SafetyAlertsforHuman>  
16 [MedicalProducts/ucm166410.htm](http://www.fda.gov/Safety/MedWatch/SafetyInformation/SafetyAlertsforHuman) Accessed 1 May 2011.  
17  
18 25. Product Recalls Australia, fentanyl transdermal patches, 2005,  
19 <http://www.recalls.gov.au/content/index.phtml/itemId/954146> Accessed 1 May  
20 2011.  
21  
22 26. Edwards IR. Fraudulent and substandard medicines. Getting Away with  
23 Murder? *Drug Saf* 2011;**34**:445-448.  
24  
25 27. WHO. WHO's role in the prevention and control of medical products of  
26 compromised quality, safety and efficacy such as  
27 substandard/spurious/falsely-labelled/falsified/counterfeit medical products.  
28 2011, [http://apps.who.int/gb/ssffc/pdf\\_files/A\\_SSFFC\\_WG2\\_3-en.pdf](http://apps.who.int/gb/ssffc/pdf_files/A_SSFFC_WG2_3-en.pdf)  
29  
30 Accessed 1 June 2012.  
31  
32  
33  
34  
35  
36  
37  
38  
39  
40  
41  
42  
43  
44  
45  
46  
47  
48  
49  
50  
51  
52  
53  
54  
55  
56  
57  
58  
59  
60



Tables and figures:

**Box 1. WHO definition of counterfeit and substandard medicines**

**Counterfeit medicine (1992):** A medicine which is deliberately and fraudulently mislabelled with respect to identity and/or source. Counterfeiting can apply to both branded and generic products. Counterfeit products may include any of the following: the correct ingredients, the wrong ingredients, no active ingredients, insufficient ingredients or fake packaging.<sup>9</sup>

**Substandard medicine:** A genuine medicine which has failed to pass the quality measurements and standards set for it can be considered as a substandard medicine.<sup>10</sup>

**Figure 1: Flow diagram of search and resulting alerts and recalls**

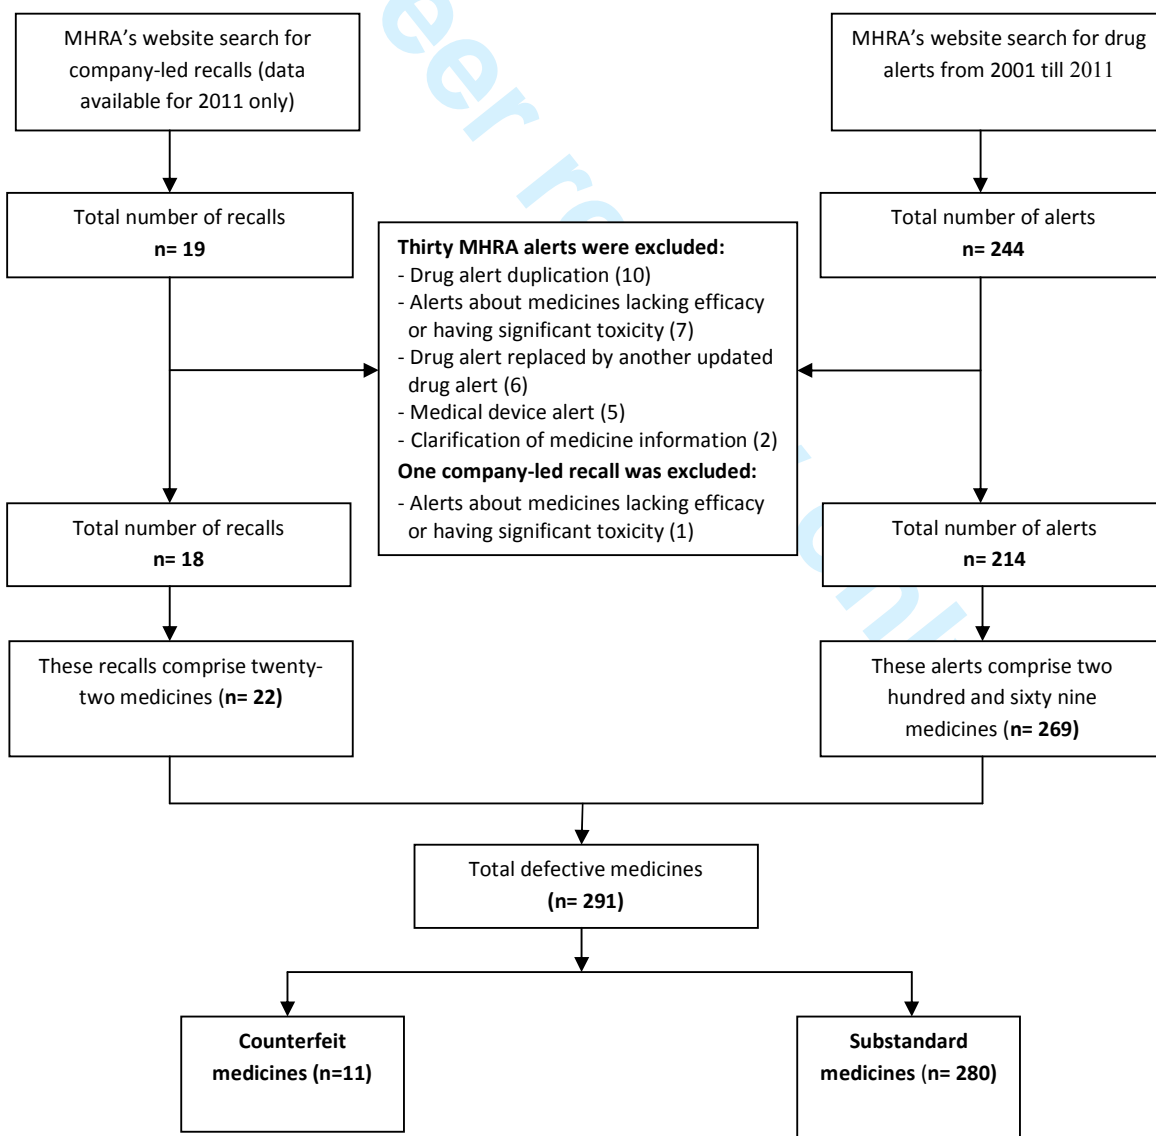

1  
2  
3  
4  
5  
6  
7  
8  
9  
10  
11  
12  
13  
14  
15  
16  
17  
18  
19  
20  
21  
22  
23  
24  
25  
26  
27  
28  
29  
30  
31  
32  
33  
34  
35  
36  
37  
38  
39  
40  
41  
42  
43  
44  
45  
46  
47  
48  
49  
50  
51  
52  
53  
54  
55  
56  
57  
58  
59  
60

**Figure 2: Number of drug alerts and defective medicines reported in the MHRA alerts from 2001 till 2011**

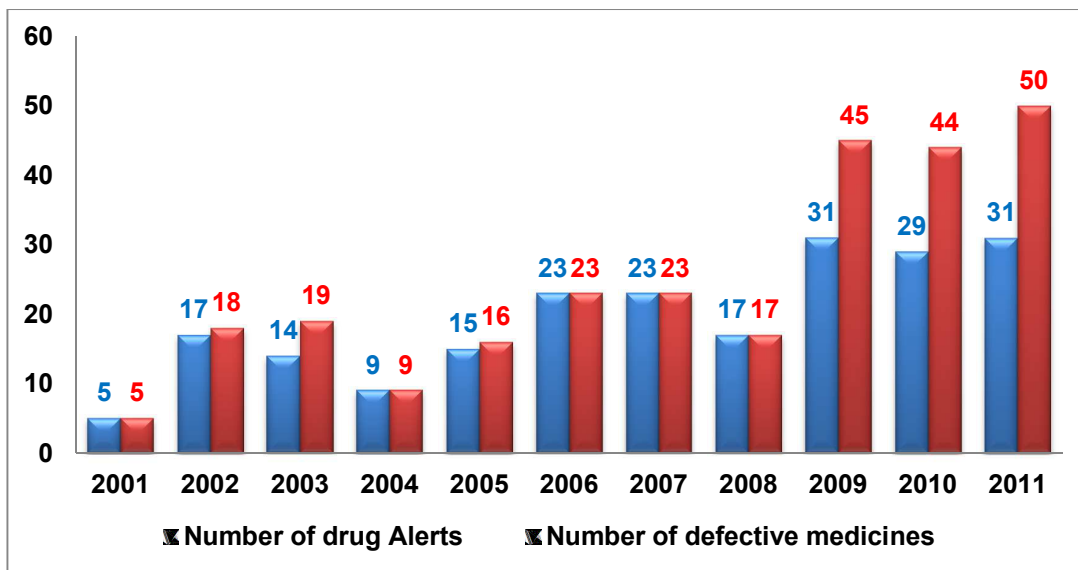

\*Some drug alerts reported more than one defective medicine.

For peer review only

Table 1: Medicines recalled by the MHRA under class 1 drug alert

|                       | Type of defect                                      | Medications                    | Formulation                                                    | Defect description                                                                                             | Time taken for the MHRA to issue drug alerts from the first distribution of defective batches (In days) |
|-----------------------|-----------------------------------------------------|--------------------------------|----------------------------------------------------------------|----------------------------------------------------------------------------------------------------------------|---------------------------------------------------------------------------------------------------------|
| Substandard medicines | Contamination                                       | Zinc Oxide BP 15% w/w          | Local preparation                                              | Lack of sterility assurance                                                                                    | 19                                                                                                      |
|                       |                                                     | Etoposide 20 mg/ml             | Injection                                                      | Lack of sterility assurance                                                                                    | Not stated                                                                                              |
|                       |                                                     | Paclitaxel 6mg/ml              | Injection                                                      | Lack of sterility assurance                                                                                    | Not stated                                                                                              |
|                       |                                                     | Tetrofosmin 230 mcg            | Injection                                                      | Gas filters used in the aseptic manufacturing process were not sterile                                         | 33                                                                                                      |
|                       |                                                     | Rabies Vaccine                 | Injection                                                      | low level of contamination with live attenuated rabies virus                                                   | 64                                                                                                      |
|                       |                                                     | Nelfinavir mesilate            | All presentations                                              | Contaminated originator and parallel distributed product                                                       | Not stated                                                                                              |
|                       | Major packaging defects                             | Ibuprofen                      | Tablets                                                        | The product contained rogue quetiapine XL 50mg tablets and gabapentin 100mg capsules                           | 117                                                                                                     |
|                       |                                                     | Ephedrine Hydrochloride 3mg/ml | Injection                                                      | Ephedrine Hydrochloride syringe in a plastic box erroneously identified as Atropine Sulphate Injection         | 44                                                                                                      |
|                       |                                                     | Bendroflumethiazide 2.5 mg     | Tablets                                                        | This batch contains Warfarin 3 mg Tablets                                                                      | 210                                                                                                     |
|                       | Delivery issues                                     | Temozolomide                   | Capsules                                                       | Reports of broken capsules and leakage                                                                         | 38                                                                                                      |
|                       |                                                     | Temozolomide                   | Capsules                                                       | Reports of broken capsules and leakage                                                                         | 91                                                                                                      |
|                       |                                                     | Fentanyl (40 mcg per dose)     | Transdermal system                                             | One batch of the transdermal system have been found to self-activate which has the potential to cause overdose | Not stated                                                                                              |
|                       |                                                     | Salbutamol 100mcg              | Inhaler                                                        | Fault with the valve which may lead to higher doses                                                            | 120                                                                                                     |
|                       | Potency issues                                      | Fentanyl Compressed Lozenge    | Compressed Lozenge                                             | The potency of the product is out of specification                                                             | 242                                                                                                     |
|                       | Issues relating to active pharmaceutical ingredient | Oxybutynin Hydrochloride 5mg   | Tablets                                                        | Excessive amount of active ingredient                                                                          | 56                                                                                                      |
|                       |                                                     | Enoxaparin Sodium 20mg & 40mg  | Injection                                                      | Excessive amount of active ingredient                                                                          | 207                                                                                                     |
| Other issues          | Protamine sulphate 10mg/ml                          | Injection                      | Failure of the finished product to meet normal assay criteria. | 13                                                                                                             |                                                                                                         |
| Counterfeit medicines | Counterfeit medicines                               | Clopidogrel 75 mg (Plavix)     | Tablets                                                        | Counterfeit parallel distributed product                                                                       | 35                                                                                                      |
|                       |                                                     | Bicalutamide 50mg (Casodex)    | Tablets                                                        | Counterfeit parallel imported product                                                                          | Not stated                                                                                              |
|                       |                                                     | Clopidogrel 75 mg (Plavix)     | Tablets                                                        | Counterfeit parallel imported product                                                                          | Not stated                                                                                              |
|                       |                                                     | Olanzapine 10mg (Zyprexa)      | Tablets                                                        | Counterfeit parallel distributed product                                                                       | Not stated                                                                                              |

Table 2: Defective medicines under class 2, 3 and 4 drug alerts

|                       | Type of defect                                      | Number of medications recalled under class 2 alert | Number of medications recalled under class 3 alert | Number of medications under class 4 alert | Company-led recalls |
|-----------------------|-----------------------------------------------------|----------------------------------------------------|----------------------------------------------------|-------------------------------------------|---------------------|
| Substandard medicines | Contamination                                       | 40                                                 | 9                                                  | 7                                         | 11                  |
|                       | Major packaging defects                             | 7                                                  | 5                                                  | 14                                        | 0                   |
|                       | Minor packaging defects                             | 40                                                 | 9                                                  | 22                                        | 1                   |
|                       | Delivery issues                                     | 17                                                 | 3                                                  | 4                                         | 5                   |
|                       | Stability failure                                   | 11                                                 | 12                                                 | 0                                         | 0                   |
|                       | Potency issues                                      | 5                                                  | 0                                                  | 0                                         | 2                   |
|                       | Issues relating to active pharmaceutical ingredient | 4                                                  | 1                                                  | 0                                         | 1                   |
|                       | Other issues                                        | 33                                                 | 0                                                  | 0                                         | 2                   |
| Counterfeit medicines | Counterfeit medicines                               | 4                                                  | 0                                                  | 1                                         | 0                   |
|                       | <b>Total</b>                                        | 161                                                | 39                                                 | 48                                        | 22*                 |

\* All company-led recalls were issued by manufacturers in 2011

Table 3: Substandard medicines

| Defect Type                  | Number of medicines | %   | Defect details                                                                           | Number of medicines |
|------------------------------|---------------------|-----|------------------------------------------------------------------------------------------|---------------------|
| Contamination                | 74                  | 27  | Impurities                                                                               | 44                  |
|                              |                     |     | Lack of sterility assurance                                                              | 18                  |
|                              |                     |     | Microbial contamination                                                                  | 12                  |
| Minor packaging defects      | 70                  | 25  | Failure to update PIL with administration or safety warning                              | 40                  |
|                              |                     |     | Incorrect information/ description of the dosage form, strength or dose of a medicine    | 12                  |
|                              |                     |     | Missing or packing PIL with the wrong carton                                             | 6                   |
|                              |                     |     | Others                                                                                   | 12                  |
| Delivery defects             | 33                  | 12  | Fault with a device                                                                      | 19                  |
|                              |                     |     | Leakage or loose seal                                                                    | 9                   |
|                              |                     |     | Others                                                                                   | 5                   |
| Major packaging defects      | 28                  | 10  | Missing or incorrect name ,strength, or active ingredient of a medicine on carton or box | 22                  |
|                              |                     |     | Packing a medicine in the wrong carton                                                   | 6                   |
| Stability defects            | 23                  | 8   | Unspecified stability failure                                                            | 15                  |
|                              |                     |     | Stability failure of the active ingredient or dissolution failure prior to expiry        | 8                   |
| Defects in active ingredient | 8                   | 3   | Active ingredient is out of specification ( either more or less)                         | 6                   |
|                              |                     |     | Non homogeneity of the active ingredient in the formulation                              | 2                   |
| Potency                      | 7                   | 2   | Sub-potent medicine (underlying causes of sub-potency were not stated)                   | 7                   |
| Other defects                | 37                  | 13  | GMP deficiencies at manufacturing site or improper storage of medicines during shipment  | 23                  |
|                              |                     |     | Others                                                                                   | 14                  |
| Total                        | 280                 | 100 |                                                                                          | 280                 |

**PIL:** Patient information leaflet; **GMP:** Good manufacturing practice

**Table 4: Substandard parenteral formulations**

| Defect Type                 | Intravenous | Subcutaneous | Intramuscular | Intravitreal | Total      |
|-----------------------------|-------------|--------------|---------------|--------------|------------|
| Contamination               | 48          | 6            | 6             | 0            | 60         |
| Minor packaging defect      | 16          | 2            | 0             | 0            | 18         |
| Delivery defect             | 9           | 4            | 0             | 1            | 14         |
| Major packaging defects     | 9           | 0            | 0             | 0            | 9          |
| Stability defect            | 2           | 1            | 1             | 0            | 4          |
| Defect in active ingredient | 0           | 1            | 0             | 0            | 1          |
| Potency                     | 2           | 0            | 3             | 0            | 5          |
| Other defects               | 3           | 1            | 2             | 0            | 6          |
| <b>Total</b>                | <b>89</b>   | <b>15</b>    | <b>12</b>     | <b>1</b>     | <b>117</b> |

**Table 5: Drug alerts relating to counterfeit medicines**

| No. | Medicines                                                          | Year | Formulation | Stated problem                                    | Class of drug alert (1-4) |
|-----|--------------------------------------------------------------------|------|-------------|---------------------------------------------------|---------------------------|
| 1   | Salmeterol 25mcg /fluticasone propionate 250 mcg , ( Seretide 250) | 2009 | Evohaler    | A reduced patient dose                            | 2                         |
| 2   | Sensodyne Original and Sensodyne Mint in 50ml tubes                | 2007 | Toothpaste  | Counterfeit toothpaste contains Diethylene Glycol | 4                         |
| 3   | Clopidogrel 75 mg (Plavix)                                         | 2007 | Tablets     | Not stated                                        | 1                         |
| 4   | Bicalutamide 50mg (Casodex)                                        | 2007 | Tablets     | Not stated                                        | 1                         |
| 5   | Clopidogrel 75 mg (Plavix)                                         | 2007 | Tablets     | Not stated                                        | 1                         |
| 6   | Olanzapine 10mg (Zyprexa)                                          | 2007 | Tablets     | Not stated                                        | 1                         |
| 7   | Atorvastatin 20mg (Lipitor)                                        | 2006 | Tablets     | Not stated                                        | 2                         |
| 8   | Atorvastatin 20mg (Lipitor)                                        | 2006 | Tablets     | Not stated                                        | 2                         |
| 9   | Atorvastatin 20mg (Lipitor)                                        | 2005 | Tablets     | Not stated                                        | 2                         |
| 10  | Sibutramine 15 mg (Reductil)                                       | 2004 | Capsules    | Not stated                                        | 2                         |
| 11  | Tadalafil 20mg (Cialis )                                           | 2004 | Tablets     | Not stated                                        | 2                         |



**Substandard and falsified medicines in the UK: A retrospective review of drug alerts (2001–2011)**

|                                 |                                                                                                                                                                                                                                             |
|---------------------------------|---------------------------------------------------------------------------------------------------------------------------------------------------------------------------------------------------------------------------------------------|
| Journal:                        | <i>BMJ Open</i>                                                                                                                                                                                                                             |
| Manuscript ID:                  | bmjopen-2013-002924.R1                                                                                                                                                                                                                      |
| Article Type:                   | Research                                                                                                                                                                                                                                    |
| Date Submitted by the Author:   | 17-May-2013                                                                                                                                                                                                                                 |
| Complete List of Authors:       | Almuzaini, Tariq; University of Nottingham, Academic Division of Child Health<br>Sammons, Helen; University of Nottingham, Academic Division of Child Health<br>Choonara, Imti; University of Nottingham, Academic Division of Child Health |
| <b>Primary Subject Heading</b>: | Health policy                                                                                                                                                                                                                               |
| Secondary Subject Heading:      | Public health, Pharmacology and therapeutics                                                                                                                                                                                                |
| Keywords:                       | Falsified , Substandard, Defective, Medicines                                                                                                                                                                                               |
|                                 |                                                                                                                                                                                                                                             |

SCHOLARONE™  
Manuscripts

1  
2  
3  
4  
5 **Substandard and falsified medicines in the UK: A retrospective**  
6 **review of drug alerts (2001–2011)**  
7  
8  
9

10  
11  
12 Tariq Almuzaini<sup>1</sup>, Helen Sammons<sup>1</sup>, Imti Choonara<sup>1</sup>

13  
14 (1) Academic Division of Child Health, University of Nottingham, Derbyshire  
15 Children's Hospital, Derby, UK  
16

17  
18  
19 **Corresponding author**

20  
21 Tariq Almuzaini

22  
23 Academic Division of Child Health

24  
25 The Medical School

26  
27 University of Nottingham

28  
29 Derbyshire Children's Hospital

30  
31 Uttoxeter Road

32  
33 Derby DE22 3DT

34  
35 UK

36  
37 Email: [mzxta@exmail.nottingham.ac.uk](mailto:mzxta@exmail.nottingham.ac.uk)  
38  
39

40  
41  
42 **Abstract:** 192 words

43  
44 **Full text:** 3526 words

45  
46 **Number of figures:** 2

47  
48 **Number of tables:** 3  
49

50  
51 **Keywords:** Falsified, substandard, defective, medicines  
52  
53  
54  
55  
56  
57  
58  
59  
60



## ABSTRACT

**Objective:** To determine the extent of substandard and falsified medicines in the UK.

**Design:** A retrospective review of drug alerts and company-led recalls.

**Setting:** The Medicines and Healthcare Products Regulatory Agency (MHRA) website search for drug alerts issued between 2001 and 2011.

**Eligibility criteria:** Drug alerts related to quality defect in medicinal products.

**Main outcome measure:** Relevant data about defective medicines reported in drug alerts and company-led recalls, including description of the defect, type of formulation, year of the alert and category of the alert.

**Results:** There were 280 substandard medicines of which 222 were recalled. The two most frequent problems were contamination (74 incidents) and issues related to packaging (98 incidents). Formulations for parenteral administration (117 incidents) were the formulation most frequently affected. There were 11 falsified medicines, as defined by the MHRA, reported over the 11 year period. The number of defective medicines reported by the MHRA increased tenfold from five in 2001 to 50 in 2011.

**Conclusions:** Substandard medicines are a significant problem in the UK. It is uncertain whether the increasing number of reports relates to improved detection or an increase in the number of substandard medicines.

### Article summary

#### Article focus

- To describe the pattern of drug alerts issued by the MHRA in the UK from 2001 to 2011.
- To determine the extent of substandard and falsified medicines in the UK.

## Key messages

- Substandard medicines are a significant problem in the UK, with a tenfold increase in the incidents reported over the last 10 years.
- Formulations for parenteral administration were most likely to be substandard.
- Education of healthcare professionals in the initial assessment of quality of medicines, especially parenteral formulation, is needed.

## Strengths and limitations of this study

### Strengths

- This is the first review to assess the problem of substandard and falsified medicines in a high income country.
- Quantification of all drug alerts issued by the MHRA over an 11-year period.

### Limitations

- Clinical significance of the problem is unknown due to the lack of available data from the MHRA or the manufacturers on the adverse events related to defective medicines.
- We were not able to determine the reason(s) for the rise of drug alerts, owing to the limited data available.

## INTRODUCTION

Falsified and substandard medicines are a significant problem throughout the world.<sup>1-4</sup> Most of the evidence for this has been reported from Africa and Asia in low and lower middle income countries.<sup>1-3</sup> Little evidence, however, is available for European and Northern American countries, as no individual studies about the problem have been published in high income countries. According to European commission data, the incidence of this problem in the European supply chain is growing by 10% to 20% annually.<sup>5,6</sup>

1  
2  
3 In the UK, the Medicines and Healthcare products Regulatory Agency (MHRA) has  
4 the responsibility of safeguarding the public from the risk of these drugs. The  
5 MHRA's Defective Medicines Report Centre (DMRC) is the department responsible  
6 for receiving and assessing reports about suspected defective drugs. Drug alerts are  
7 issued by the DMRC to the manufacturer, wholesalers and healthcare providers, in  
8 cases where a defective medicine is shown to compromise patients' safety.<sup>7</sup>  
9  
10  
11  
12

13  
14  
15 The aims of this study were to describe the number of drug alerts issued by the  
16 MHRA and to determine the extent of substandard and falsified medicines in the UK.  
17  
18

## 19 **METHODS**

20  
21 The DMRC defines a defective drug as a "drug which proves to be harmful under  
22 normal conditions of use, lacking in therapeutic efficacy and/or the qualitative and  
23 quantitative composition of a drug is not as declared. A drug can also be defective if  
24 the controls on a drug and/or on the ingredients and the controls at an intermediate  
25 stage of the manufacturing process have not been carried out or if some other  
26 requirement or obligation relating to the grant of the manufacturing authorisation has  
27 not been fulfilled."<sup>8</sup>  
28  
29  
30  
31  
32  
33

34  
35 There is currently no agreed international definition of a falsified medical product.  
36 The 2011 WHO definition of Substandard/spurious/false-labelled/falsified/  
37 counterfeit (SSFFC) medical products does not differentiate between different types  
38 of compromised medicines that need distinct regulatory actions.<sup>9</sup> Attaran and  
39 colleagues have proposed a clearer definition, differentiating between falsified and  
40 substandard medicines in relation to if a medicine is a public health crime, and  
41 therefore an intentional wrong doing, or if there has been a regulatory failure and no  
42 intentional wrong has taken place.<sup>4</sup> No specific definition exists within English law  
43 and the MHRA adopts the definition contained within the European Falsified  
44 Medicines Directive. They look for clear evidence that there was an intention to  
45 deceive a consumer, patient, healthcare professional and/or operator within the  
46 supply chain, into believing that the medical product being manufactured offered or  
47 supplied was the genuine article when in fact it was not.<sup>10</sup> In this paper we define  
48 medicines that failed to pass the quality measurements and standards set for them  
49  
50  
51  
52  
53  
54  
55  
56  
57  
58  
59  
60

1  
2  
3 as substandard medicines. On the other hand, falsified medicines are those which  
4 don't meet the quality specifications of regulatory authority with deliberate intent.  
5  
6

7  
8 A search for drug alerts related to defective medicinal products was carried out. This  
9 was performed through the official MHRA website using the section allocated for  
10 drug alerts. The first drug alert reported on the MHRA website was in the year 2001;  
11 thus, all drug alerts issued between 2001 and 2011 were included. Manufacturers  
12 can also voluntarily recall their defective products without the need for a drug alert to  
13 be issued by the MHRA in cases where defective medicines have left manufacturing  
14 sites but have had limited distribution in the supply chain. The MHRA started posting  
15 these recalls under its company-led recall section in 2011; hence, all these recalls  
16 were included. The resulting alerts and recalls were compiled and exclusion criteria  
17 included the following: drug alert replaced by another updated one, drug alert  
18 duplication, alert about clarification of medicine information, medical device alert and  
19 alert about medicines lacking efficacy or having significant toxicity.  
20  
21  
22  
23  
24  
25  
26  
27  
28

29 The following data was extracted from these alerts: name, strength and dosage form;  
30 year of the alert; number of affected batches; nature of the defect; class of drug alert  
31 and action to be taken about defective medicine. Substandard medicines were then  
32 subdivided according to the type of the defect into the following:  
33  
34  
35  
36  
37

- 38 ➤ **Contamination:** Defect related to microbial contaminations and issues  
39 related to sterility as well as chemical and particulate (i.e. impurities)  
40 contamination.  
41
- 42 ➤ **Minor packaging defect:** Defects that occur in relation to the printing of  
43 packaging materials, for instance, printed box errors that involve a missing  
44 or incorrect expiry date or batch number of a medicine. This also includes  
45 any errors in the patients' information leaflets (PIL) or summary of product  
46 characteristic.  
47
- 48 ➤ **Major packaging defects:** A defect that involves packing a medicine in a  
49 wrong box or carton or printing errors that involve missing or incorrect  
50 name or strength of a medicine.  
51
- 52 ➤ **Delivery:** A technical or physical defect such as broken capsules or  
53 leaking containers.  
54  
55  
56  
57  
58  
59  
60

- **Stability failure:** Defect results from the failure of the medicine to remain within the established standards throughout the expiration period, for example, low assay of the active ingredient prior to a product expiry.
- **Potency:** Failure of the medicine to evoke the desired effect within the stated strength.
- **Defect in active ingredient:** Defect results from the active ingredient being inadequate or excessive in the formulation.
- **Other defects:** Other deviations concerning non-compliance with good manufacturing practice at manufacturing site.

The total number of alerts was obtained and each individual medicine reported in these alerts was then extracted. Defective medicines were then classified according to the World Health Organization Anatomical Therapeutic Chemical (ATC) Classification System. This system uses five levels to classify medicines and the first two levels were used in this section. The first level classifies medicine according to the system or organ on which the medicine acts; whereas, the second level classifies medicine according to its main therapeutic group.<sup>11</sup>

Company-led recalls are initiated by manufacturers after consultation with the MHRA, without giving the recall any degree of urgency. Drug alerts, by contrast, are issued by the MHRA and have four possible classifications based on the level of the risk.<sup>8</sup> These classes are as follows:

- **Class 1 drug alert:** The defect in a medicine is life-threatening and poses a serious risk to patient health
- **Class 2 drug alert:** The defect in a medicine is not life-threatening but can still be harmful to patients
- **Class 3 drug alert:** The defect in a medicine is unlikely to be hazardous to patients, but an alert is issued, due to problems related to non-compliance with good manufacturing practices or marketing authorisations
- **Class 4 drug alert:** The least critical alert; advises “caution in use”.

1  
2  
3 Class 1, 2 and 3 drug alerts require recalls of affected batches, whereas class 4 alerts  
4 do not require recalls but require caution in dealing with defective medicines.<sup>8</sup>  
5  
6

7  
8 Three types of compromised medicine can be recognised in the alerts; namely:  
9 falsified, substandard and medicines withdrawn because of safety or toxicity concerns.  
10 The decision of which medicines were falsified was made from the MHRA  
11 classification.<sup>12</sup> Only medicines where it was made clear in the recall that the batch  
12 was regarded by the MHRA as counterfeit/falsified were given this label. No data was  
13 available to the authors to further analyse if the error was intentional or non-intentional.  
14 All alerts that were not included in the MHRAs specific falsified medical products list  
15 were therefore classified as substandard medicines.  
16  
17  
18  
19  
20  
21

## 22 **RESULTS**

### 23 **Incident trends**

24  
25  
26  
27  
28  
29 There were a total of 244 drug alerts issued by the MHRA. After applying the  
30 aforementioned exclusion criteria, 30 were excluded. In turn, 214 were deemed  
31 suitable for inclusion (Figure 1). Analysis showed that these alerts reported 269  
32 medicines, each of which represented an individual incident. The majority of these  
33 alerts were issued for individual medicines. However, some were issued for up to 14  
34 medicines.  
35  
36  
37  
38  
39

40  
41 Since MHRA started reporting drug alerts online in 2001, there has been a gradual  
42 increase in the rate of drug alerts related to defective medicinal products. The  
43 number of drug alerts increased from five in 2001 to 31 in 2011. The number of  
44 defective medicines reported by these alerts was five in 2001. This figure increased  
45 tenfold by 2011, to a total of 50 (Figure 2).  
46  
47  
48  
49

### 50 **Defective medicines recalled by the MHRA under class 1, 2, 3, 4 drug alerts**

51  
52 Seventeen medicines were recalled under class 1 drug alerts. The highest number of  
53 alerts was issued for contamination reasons. The most frequent formulations reported  
54 were formulations for parenteral administration, which accounted for seven cases.  
55 The median time, when stated, taken by the MHRA to identify these medicines as  
56  
57  
58  
59  
60

1  
2  
3 defective, from medicines being available on the market, to issuing alerts was 64 days  
4 (range 13-242 days). The length of this time period is critical, as the chance of  
5 adverse events increases as the time of exposure increases. Details of these alerts  
6 are shown in Table 1.  
7  
8

9  
10 Under a class 2 alert, 161 medicines were recalled. The main issues were related to  
11 contamination and minor packaging defects. There were also 87 medicines recalled  
12 under class 3 or 4 alerts (online supplementary table 1).  
13  
14

### 15 16 **Defective medicines recalled by Manufacturers (Company-led recalls)**

17  
18 It was observed that 19 company-led recalls were issued by the manufacturers in  
19 2011. One recall was excluded after applying the exclusion criteria. Thus, 18  
20 company-led recalls were included and these were issued for a total of 22 defective  
21 medicines (Figure 1).  
22  
23  
24

### 25 26 **Defective medicines, classified by type of defect**

27  
28 The incidents of defective medicines reported by the MHRA (269) were compiled  
29 with those reported by the manufacturers (22), which resulted in 291 incidents to be  
30 considered for further analysis.  
31  
32  
33

34  
35 Substandard medicines:

36 Defects in substandard medicines accounted for the bulk of these incidents. Two  
37 hundred and eighty medicines (96%) were reported to be substandard (Figure 1). A  
38 total of 222 medicines were recalled. The two most frequent problems, with the  
39 substandard medicines, were packaging and contamination (Table 2).  
40 Contamination was a significant issue with parenteral formulations where there were  
41 a total of 60 incidents (online supplementary table 2). Formulations for parenteral  
42 administration were most frequently affected by quality issues, with a total of 117  
43 incidents (42%). Formulations for intravenous administration accounted for the  
44 majority of the cases (89 incidents). Other formulations affected were subcutaneous  
45 (15 incidents) and intramuscular formulations (12 incidents).  
46  
47  
48  
49  
50  
51  
52  
53

54  
55 Packaging defects were the other most frequent problem. In many cases these  
56 involved significant clinical issues such as incorrect name, strength or active  
57 ingredient of a medicine on the packaging or errors in the product information leaflet  
58  
59  
60

1  
2  
3 in relation to administration or toxicity. The number of defective medicines was  
4 highest amongst drugs that act on the nervous system (45/280), cardiovascular  
5 system (41) and infections (35). When these medicines were classified by  
6 therapeutic class, those most frequently reported defective were antihypertensives  
7 (27/280), antineoplastic agents (21/280) and antibacterials (19/280). Details are  
8 given in online supplementary table 3.  
9  
10  
11  
12

13  
14 The UK Health and Social Care Information Centre published a list of the 20 drugs  
15 that contained the greatest number of items dispensed in 2011 by volume.<sup>13</sup> Ten of  
16 these 20 medicines were associated with a total of 22 incidents of substandard  
17 medicines.  
18  
19  
20  
21

22  
23 The study identified 89 manufacturers, holding the marketing authorisation for 280  
24 medicines which were recalled by the MHRA. Manufacturers who held the marketing  
25 authorisation of 5 or more recalled medicines are listed in supplementary online table  
26 4. Fifteen manufacturers fit this criterion. Together, they hold the authorisation for  
27 163 medicines, accounting for 58% of all recalled medicines. The majority of these  
28 manufacturers have manufacturing facilities in the UK, four having headquarters in  
29 the UK (Glaxosmithkline, AstraZeneca, Martindale Pharmaceuticals and Karib Kemi  
30 Pharm). The supplementary online table 4 also describes individual manufacturing  
31 defects for all listed manufacturers.  
32  
33  
34  
35  
36  
37  
38

#### 39 Falsified medicines:

40 Since 2004, 11 incidents of falsified drugs have been reported by the MHRA that  
41 breached the UK supply chain (Table 3). The last of these was reported in 2009. In  
42 2007 alone, the MHRA stated in its falsified medical products strategy (2012-2015)  
43 that more than 2 million doses of falsified medicines entered the supply chain.<sup>10</sup> A total  
44 of 700 000 doses were recalled from pharmacies or patients.<sup>10</sup> In these alerts,  
45 information regarding the actual problems with the falsified medicines is given for only  
46 two of the 11 incidents reported. In its recent strategy on falsified medicines, the  
47 MHRA stated that the previous falsified medicines seized had one or more quality  
48 defect issues concerning active ingredients, disintegration, dissolution or presence of  
49 unknown impurities.<sup>10</sup>  
50  
51  
52  
53  
54  
55  
56  
57  
58  
59  
60



## DISCUSSION

This review has shown that the problem of defective medicines reported in the UK has increased tenfold over the eleven years studied. It is likely that the incidence of defective medicines has actually increased in the UK, but there is insufficient data to prove this. The most frequent formulations reported to be defective were the formulations for parenteral administration, which accounted for 42% of cases. Substandard medicines represented the bulk of defective medicine incidents, accounting for over 95% of the cases. Contamination issues were the most frequently reported clinically relevant problems reported; 80% of these contaminated formulations were formulations for parenteral administration. There is a greater likelihood of harm to the patient in association with contaminated parenteral formulations as highlighted by the recent outbreak of fungal sepsis in the USA.<sup>14</sup> However, these adverse health consequences have not been documented by the MHRA or the manufacturers.

### Substandard medicines

It is not clear whether the increase in the trend of substandard medicines incidents resulted from new legislation or strategies by the MHRA, that have made it easier to detect and report these drugs, or whether the rate of manufacture of substandard medicines in the UK is increasing. The overall performance of the MHRA has improved since it was officially launched in 2003.<sup>15, 16</sup> The introduction and development of the MHRA's website since 2003/04, as well as the addition of an integrated site for medicines and medical devices, opened important communication channels with healthcare providers and stakeholders.<sup>15</sup> The MHRA has introduced guidelines to healthcare professionals outlining procedures for reporting medicines suspected to be defective.<sup>8</sup> These guidelines outline the role that healthcare professionals play in the initial assessment of suspected defected medicines. They also illustrate subsequent investigations that can be carried out by the DMRC before it issues a drug alert. The ease of access to these guidelines through the MHRA's website may increase healthcare providers' awareness about how to deal with these drugs. It is now possible to report these drugs online or over the phone if the healthcare professional thinks that the defect in a drug may represent a serious risk to public health.

1  
2  
3 These developments may facilitate the reporting of defective drugs by health care  
4 providers or by manufacturers. In 2003/04, the DMRC received 298 reports about  
5 defective medicines.<sup>15</sup> The number of these reports has increased, totaling 830 in  
6 2010/11.<sup>16</sup> However the level of awareness of healthcare professionals about these  
7 drugs and how to report them has not been tested. For this reason, the possibility  
8 cannot be excluded that both the real incidence and the rate of manufacturing of  
9 poor quality medicines are increasing.  
10

11  
12  
13  
14  
15  
16 It was of concern that parenteral formulations for intravenous injection or infusion  
17 were the formulation most likely to be substandard. The risk of drug toxicity is far  
18 greater with drugs given intravenously than those given orally. The toxicity  
19 associated with substandard medicines worldwide is unknown.<sup>17</sup> Healthcare  
20 professionals should therefore be aware of the expected risk. Healthcare providers  
21 should be educated in the initial assessment of medicines, especially parenteral  
22 formulations, for any sign of impurity, particulate contamination, or improper sealing.  
23 If anything appears suspicious, the healthcare providers should know how to report  
24 this defect immediately to the DMRC before any further harm can occur.  
25  
26  
27  
28  
29  
30  
31

### 32 **Falsified medicines**

33  
34 The majority of falsified medicine incidents were reported by the MHRA in the period  
35 between 2004 and 2007. Information regarding the actual quality-defect type beyond  
36 authenticity has been stated for only two cases. Information on the other nine cases  
37 has been requested from the MHRA but has not been provided. Five incidents of  
38 falsified drugs were reported in 2007 alone. This led the MHRA to introduce its first  
39 anti-counterfeiting strategy in 2007.<sup>18</sup> The strategy outlined a 3-year plan to combat  
40 falsified medicines through a visionary program of communication, collaboration, and  
41 regulation. Since then, the MHRA has reported only one incident in 2009. This may  
42 be attributed to the effectiveness of this strategy in reducing the availability of these  
43 drugs in UK supply chains.  
44  
45  
46  
47  
48  
49  
50  
51

52  
53 The UK has a stringent regulatory oversight of the supply chain, which is  
54 represented by the few cases of falsified medicines reported over an 11-year period.  
55 Falsified medicines are frequently manufactured abroad and imported to the UK.<sup>10</sup>  
56 The criminal may choose the internet for distribution (given that it is less regulated).  
57  
58  
59  
60

1  
2  
3 Thus, the problem of drug counterfeiting is exacerbated by unregulated online  
4 pharmacies. Patients may use the Internet because of the following: the anonymity  
5 of the Internet, offering cheaper medications and receiving prescription-only drugs  
6 without prescription.<sup>19</sup> Falsified drugs do not comply with prerequisite quality and  
7 safety standards and therefore are hazardous to patients' health, being at best  
8 clinically ineffective and at worst can cause death. The public needs to be made  
9 aware of this risk. Adverse events of these drugs have been reported in different  
10 countries,<sup>20, 21</sup> including the UK.<sup>22</sup>

11  
12  
13 Falsified medicines are criminal problem according the law enforcement agencies  
14 and a menace to public health. Falsified medicines are more likely if there is a weak  
15 regulatory system and supply chain. In order to tackle the issue of falsified  
16 medicines, a multisectoral approach is needed. This needs to involve law  
17 enforcement agencies alongside global public health stakeholders, from both public  
18 and private sectors, and the media.

### 29 30 **Pharmacovigilance**

31 Events caused by defective medicines are sometimes relatively difficult to distinguish  
32 from those considered to be the result of accidents, errors, or adverse drug  
33 reactions. An example is the fentanyl transdermal patch. Fentanyl is a strong opioid  
34 analgesic (about 80 times stronger than morphine) used to treat chronic pain.<sup>23</sup> It has  
35 a narrow therapeutic window, and an overdose can result in adverse effects,  
36 including respiratory arrest and death. Several deaths due to fentanyl patch  
37 overdose have been reported worldwide,<sup>24</sup> including the UK.<sup>25</sup> Overdoses can be  
38 caused by excessive application of patches, incorrect product use (e.g., cutting the  
39 patch), and exposing the patches or the skin to any kind of heat, which can  
40 dramatically increase the drug's absorption through the skin.<sup>24</sup> Certain fentanyl  
41 patches and transdermal systems have been recalled in different countries,<sup>26, 27</sup>  
42 including the UK (Table 1). The defects in all cases resulted from either a cut in one  
43 side of the fentanyl patch reservoir or self-activation of the transdermal system; both  
44 have the potential to cause overdose. In such cases, it can be difficult to distinguish  
45 between the events related to adverse drug reaction, misuse, or accidents, and  
46 those that are caused by defective products. There is a possibility, therefore, that  
47  
48  
49  
50  
51  
52  
53  
54  
55  
56  
57  
58  
59  
60

1  
2  
3 some cases of adverse events related to this defect have been attributed to the  
4 adverse-reaction nature of the drug and have gone unreported.  
5  
6  
7

### 8 **Limitations**

9  
10 The main limitation of the review was the lack of available data on the adverse  
11 events related to defective medicines. The data has been not provided to the authors  
12 by the MHRA or the manufacturers. A comparison between the expected risk and  
13 pharmacovigilance data could not be performed as pharmacovigilance reports in the  
14 UK are held by the MHRA and are not in the public domain. Thus, the clinical  
15 significance of the problem is unknown. Company-led recalls have been posted on  
16 the MHRA website since 2011; information on these recalls for previous years has  
17 not been provided. Due to the lack of information made available, we were not able  
18 to determine the reason(s) for the rise in defective medicines.  
19  
20  
21  
22  
23  
24  
25

### 26 **CONCLUSION**

27  
28 The reporting of substandard medicines in the UK is on the rise. There was an  
29 increase from five incidents in 2001 to 50 incidents in 2011. Parenteral formulations  
30 were most likely to be substandard. There is a greater likelihood of harm to the  
31 patient in association with contaminated parenteral formulations, but the clinical  
32 significance of the problem is unknown, due to the lack of information related to their  
33 toxicity. Healthcare providers should know how to assess the quality of medicines,  
34 particularly parenteral formulations for any sign that can be an indication of  
35 contamination and sterility failure.  
36  
37  
38  
39  
40  
41  
42  
43

### 44 **Contributors:**

45 TA performed the search, extracted the data and drafted the paper. HS double-  
46 checked the extracted data, conceived the idea and interpreted the results. IC had  
47 the original idea for the study. IC and TA designed the review and IC critically  
48 revised the manuscript and supervised the study. All authors approve of this final  
49 submitted version after their revision of the manuscript.  
50  
51  
52  
53  
54

55 **Competing interests:** None.  
56  
57  
58  
59  
60

1  
2  
3 **Funding:** This research received no specific grant from any funding agency in the  
4 public, commercial or not-for-profit sectors.  
5  
6

7  
8 **Ethical approval:** Not required.  
9

10  
11 **Data sharing:** No additional data available.  
12  
13

14  
15  
16  
17  
18  
19  
20  
21  
22  
23  
24  
25  
26  
27  
28  
29  
30  
31  
32  
33  
34  
35  
36  
37  
38  
39  
40  
41  
42  
43  
44  
45  
46  
47  
48  
49  
50  
51  
52  
53  
54  
55  
56  
57  
58  
59  
60

For peer review only

## References

1. Bate R, Jensen P, Hess K, *et al.* Substandard and falsified anti-tuberculosis drugs: a preliminary field analysis. *Int J Tuberc Lung Dis* 2013;**17**(3):308-11.
2. Bate R, Coticelli P, Tren R, *et al.* Antimalarial drug quality in the most severely malarious parts of Africa – a six country study. *PLoS One* 2008;**3**:e2132.
3. Caudron JM, Ford N, Henkens M, *et al.* Substandard medicines in resource-poor settings: a problem that can no longer be ignored. *Trop Med Int Health* 2008;**13**(8):1062-1072.
4. Attaran A, Barry D, Basheer S, *et al.* How to achieve international action on falsified and substandard medicines. *BMJ* 2012;**345**:e7381.
5. European Commission. Policies to Combat Counterfeit Medicines, Contribution to Impact Assessment - 2008, London.  
[http://ec.europa.eu/health/files/counterf\\_par\\_trade/counterfeit-study-main-report\\_en.pdf](http://ec.europa.eu/health/files/counterf_par_trade/counterfeit-study-main-report_en.pdf) Accessed 30 January 2012.
6. Williams A. Europe prepares to battle the counterfeiters. *Pharmaceutical Technology Europe* 2011;**23**:9-11
7. MHRA. Defective Medicines Report Centre (2011).  
<http://www.mhra.gov.uk/Safetyinformation/Howwemonitorthesafetyofproducts/Medicines/DefectiveMedicinesReportCentre/index.htm> Accessed 30 January 2012.
8. MHRA. A Guide to Defective Medicinal Products.  
<http://www.mhra.gov.uk/home/groups/is-lic/documents/publication/con007572.pdf> Accessed 30 January 2012.
9. WHO. WHO's role in the prevention and control of medical products of compromised quality, safety and efficacy such as substandard/spurious/falsely-labelled/falsified/counterfeit medical products. 2011.  
[http://apps.who.int/gb/ssffc/pdf\\_files/A\\_SFFC\\_WG2\\_3-en.pdf](http://apps.who.int/gb/ssffc/pdf_files/A_SFFC_WG2_3-en.pdf). Accessed 1 June 2012.

10. MHRA, Falsified Medical Products Strategy (2012-2015), .  
<http://www.mhra.gov.uk/home/groups/ei/documents/websiteresources/con149816.pdf>  
Accessed 15 October 2012.
11. WHOCC. ATC Structure and principles.  
[http://www.whooc.no/atc/structure\\_and\\_principles/](http://www.whooc.no/atc/structure_and_principles/) Accessed 30 January 2012.
12. MHRA, Counterfeit medicine recalls and previously seen counterfeits, .  
<http://www.mhra.gov.uk/Safetyinformation/Generalsafetyinformationandadvice/Adviceandinformationforconsumers/counterfeitmedicinesanddevices/FalsifiedMedicineRecallsandpreviouslyseencounterfeits/index.htm> Accessed 15 October 2012.
13. HSCIC, Prescriptions Dispensed in the Community, Statistics for England (2001-2011). <http://www.hscic.gov.uk/catalogue/PUB06941> Accessed 15 December 2012.
14. Davies E. More US citizens die from meningitis as scope of inquiry widens. *BMJ* 2012;**345**:e7095.
15. MHRA Annual Report and Accounts 2003/04.  
<http://www.mhra.gov.uk/home/groups/comms-ic/documents/websiteresources/con008340.pdf> Accessed 17 April 2012.
16. MHRA annual statistics 2010/11. <http://www.mhra.gov.uk/home/groups/comms-ic/documents/websiteresources/con123239.pdf> Accessed 17 April 2012.
17. Edwards IR. Fraudulent and substandard medicines. Getting Away with Murder? *Drug Saf* 2011;**34**:445-448.
18. MHRA. Anti-counterfeiting strategy 2007-2010.  
<http://www.mhra.gov.uk/home/groups/ei/documents/websiteresources/con2033156.pdf> Accessed 15 April 2012.
19. European Alliance for Access to Safe Medicines. The counterfeiting superhighway. 2008.  
[http://v35.pixelcms.com/ams/assets/312296678531/455\\_EAASM\\_counterfeiting%20report\\_020608.pdf](http://v35.pixelcms.com/ams/assets/312296678531/455_EAASM_counterfeiting%20report_020608.pdf) Accessed 5 May 2011.

- 1  
2  
3  
4  
5  
6  
7  
8  
9  
10  
11  
12  
13  
14  
15  
16  
17  
18  
19  
20  
21  
22  
23  
24  
25  
26  
27  
28  
29  
30  
31  
32  
33  
34  
35  
36  
37  
38  
39  
40  
41  
42  
43  
44  
45  
46  
47  
48  
49  
50  
51  
52  
53  
54  
55  
56  
57  
58  
59  
60
20. Solomon S. BC woman killed by fake drugs bought online: 'Metal toxicity' from counterfeit pills reinforces danger of Internet meds. *National Review of Medicine* 2007,[http://www.nationalreviewofmedicine.com/issue/2007/07\\_30/4\\_policy\\_politics\\_13.html](http://www.nationalreviewofmedicine.com/issue/2007/07_30/4_policy_politics_13.html) Accessed 15 December 2012.
  21. Chaubey S, Sangla K, Suthaharan E, *et al*. Severe hypoglycaemia associated with ingesting counterfeit medication. *Med J Aust* 2010;**192**(12):716-7.
  22. Barber T, Jacyna M. Acute lead intoxication from medications purchased online presenting with recurrent abdominal pain and encephalopathy. *J R Soc Med* 2011;**104**(3):120-3.
  23. Käferstein H, Sticht G. Comparison of nonradioactive microtiter plate enzyme immunoassays for the sensitive detection of fentanyl. *Forensic Sci Int* 2000;**113**(1-3):353-357.
  24. Jumbelic MI. Deaths with transdermal fentanyl patches. *Am J Forensic Med Pathol* 2010;**31**(1):18-21.
  25. MHRA. Fentanyl patches: serious and fatal overdose from dosing errors, accidental exposure, and inappropriate use. Drug Safety Update Sept 2008, vol 2 issue 2: 2.: <http://www.mhra.gov.uk/Safetyinformation/DrugSafetyUpdate/CON087796> Accessed 1 May 2011.
  26. FDA. . Duragesic (fentanyl transdermal system), class 1 recall notice. 2004. <http://www.fda.gov/Safety/MedWatch/SafetyInformation/SafetyAlertsforHumanMedicinalProducts/ucm166410.htm> Accessed 1 May 2011.
  27. Product Recalls Australia, fentanyl transdermal patches, 2005. . <http://www.recalls.gov.au/content/index.phtml/itemId/954146> Accessed 1 May 2011.



1  
2  
3 **Figure legends:**  
4

5  
6 **Figure 1: Flow diagram of search and resulting alerts and recalls**  
7

8 **Figure 2: Number of drug alerts and defective medicines reported in the MHRA**  
9 **alerts from 2001 till 2011**  
10  
11  
12  
13  
14  
15  
16  
17  
18  
19  
20  
21  
22  
23  
24  
25  
26  
27  
28  
29  
30  
31  
32  
33  
34  
35  
36  
37  
38  
39  
40  
41  
42  
43  
44  
45  
46  
47  
48  
49  
50  
51  
52  
53  
54  
55  
56  
57  
58  
59  
60

For peer review only

Table 1: Substandard medicines recalled by the MHRA under class 1 drug alert

|                       | Type of defect                                      | Medications                    | Formulation                                                    | Defect description                                                                                             | Time taken for the MHRA to issue drug alerts from the first distribution of defective batches (In days) |
|-----------------------|-----------------------------------------------------|--------------------------------|----------------------------------------------------------------|----------------------------------------------------------------------------------------------------------------|---------------------------------------------------------------------------------------------------------|
| Substandard medicines | Contamination                                       | Zinc Oxide BP 15% w/w          | Local preparation                                              | Lack of sterility assurance                                                                                    | 19                                                                                                      |
|                       |                                                     | Etoposide 20 mg/ml             | Injection                                                      | Lack of sterility assurance                                                                                    | Not stated                                                                                              |
|                       |                                                     | Paclitaxel 6mg/ml              | Injection                                                      | Lack of sterility assurance                                                                                    | Not stated                                                                                              |
|                       |                                                     | Tetrofosmin 230 mcg            | Injection                                                      | Gas filters used in the aseptic manufacturing process were not sterile                                         | 33                                                                                                      |
|                       |                                                     | Rabies Vaccine                 | Injection                                                      | low level of contamination with live attenuated rabies virus                                                   | 64                                                                                                      |
|                       |                                                     | Nelfinavir mesilate            | All presentations                                              | Contaminated originator and parallel distributed product                                                       | Not stated                                                                                              |
|                       | Major packaging defects                             | Ibuprofen                      | Tablets                                                        | The product contained rogue quetiapine XL 50mg tablets and gabapentin 100mg capsules                           | 117                                                                                                     |
|                       |                                                     | Ephedrine Hydrochloride 3mg/ml | Injection                                                      | Ephedrine Hydrochloride syringe in a plastic box erroneously identified as Atropine Sulphate Injection         | 44                                                                                                      |
|                       |                                                     | Bendroflumethiazide 2.5 mg     | Tablets                                                        | This batch contains Warfarin 3 mg Tablets                                                                      | 210                                                                                                     |
|                       | Delivery issues                                     | Temozolomide*                  | Capsules                                                       | Reports of broken capsules and leakage                                                                         | 38                                                                                                      |
|                       |                                                     | Temozolomide*                  | Capsules                                                       | Reports of broken capsules and leakage                                                                         | 91                                                                                                      |
|                       |                                                     | Fentanyl (40 mcg per dose)     | Transdermal system                                             | One batch of the transdermal system have been found to self-activate which has the potential to cause overdose | Not stated                                                                                              |
|                       |                                                     | Salbutamol 100mcg              | Inhaler                                                        | Fault with the valve which may lead to higher doses                                                            | 120                                                                                                     |
|                       | Potency issues                                      | Fentanyl Compressed Lozenge    | Compressed Lozenge                                             | The potency of the product is out of specification                                                             | 242                                                                                                     |
|                       | Issues relating to active pharmaceutical ingredient | Oxybutynin Hydrochloride 5mg   | Tablets                                                        | Excessive amount of active ingredient                                                                          | 56                                                                                                      |
|                       |                                                     | Enoxaparin Sodium 20mg & 40mg  | Injection                                                      | Excessive amount of active ingredient                                                                          | 207                                                                                                     |
| Other issues          | Protamine sulphate 10mg/ml                          | Injection                      | Failure of the finished product to meet normal assay criteria. | 13                                                                                                             |                                                                                                         |

\*Two separate incidents.

Table 2: Substandard medicines

| Defect Type                  | Number of medicines | %   | Defect details                                                                           | Number of medicines |
|------------------------------|---------------------|-----|------------------------------------------------------------------------------------------|---------------------|
| Contamination                | 74                  | 27  | Impurities                                                                               | 44                  |
|                              |                     |     | Lack of sterility assurance                                                              | 18                  |
|                              |                     |     | Microbial contamination                                                                  | 12                  |
| Minor packaging defects      | 70                  | 25  | Failure to update PIL with administration or safety warning                              | 40                  |
|                              |                     |     | Incorrect information/ description of the dosage form, strength or dose of a medicine    | 12                  |
|                              |                     |     | Missing or packing PIL with the wrong carton                                             | 6                   |
|                              |                     |     | Others                                                                                   | 12                  |
| Delivery defects             | 33                  | 12  | Fault with a device                                                                      | 19                  |
|                              |                     |     | Leakage or loose seal                                                                    | 9                   |
|                              |                     |     | Others                                                                                   | 5                   |
| Major packaging defects      | 28                  | 10  | Missing or incorrect name ,strength, or active ingredient of a medicine on carton or box | 22                  |
|                              |                     |     | Packing a medicine in the wrong carton                                                   | 6                   |
| Stability defects            | 23                  | 8   | Unspecified stability failure                                                            | 15                  |
|                              |                     |     | Stability failure of the active ingredient or dissolution failure prior to expiry        | 8                   |
| Defects in active ingredient | 8                   | 3   | Active ingredient is out of specification ( either more or less)                         | 6                   |
|                              |                     |     | Non homogeneity of the active ingredient in the formulation                              | 2                   |
| Potency                      | 7                   | 2   | Sub-potent medicine (underlying causes of sub-potency were not stated)                   | 7                   |
| Other defects                | 37                  | 13  | GMP deficiencies at manufacturing site or improper storage of medicines during shipment  | 23                  |
|                              |                     |     | Others                                                                                   | 14                  |
| Total                        | 280                 | 100 |                                                                                          | 280                 |

**PIL:** Patient information leaflet; **GMP:** Good manufacturing practice

**Table 3: Drug alerts relating to falsified medicines**

| No. | Medicines                                                          | Year | Formulation | Recall level            | Stated problem/Defect description                                                      | Class of drug alert (1-4) |
|-----|--------------------------------------------------------------------|------|-------------|-------------------------|----------------------------------------------------------------------------------------|---------------------------|
| 1   | Salmeterol 25mcg /fluticasone propionate 250 mcg , ( Seretide 250) | 2009 | Evohaler    | Pharmacy and wholesaler | A reduced patient dose                                                                 | 2                         |
| 2   | Sensodyne Original and Sensodyne Mint in 50ml tubes                | 2007 | Toothpaste  | Caution                 | Counterfeit toothpaste contains Diethylene Glycol ( nephrotoxic and neurotoxic poison) | 4                         |
| 3   | Clopidogrel 75 mg (Plavix)*                                        | 2007 | Tablets     | Pharmacy                | Not likely to pose an immediate risk to patients. (Parallel imported product)          | 1                         |
| 4   | Bicalutamide 50mg (Casodex)                                        | 2007 | Tablets     | Patient                 |                                                                                        | 1                         |
| 5   | Clopidogrel 75 mg (Plavix)*                                        | 2007 | Tablets     | Pharmacy                |                                                                                        | 1                         |
| 6   | Olanzapine 10mg (Zyprexa)                                          | 2007 | Tablets     | Patient                 |                                                                                        | 1                         |
| 7   | Atorvastatin 20mg (Lipitor)*                                       | 2006 | Tablets     | Pharmacy                |                                                                                        | 2                         |
| 8   | Atorvastatin 20mg (Lipitor)*                                       | 2006 | Tablets     | Pharmacy                |                                                                                        | 2                         |
| 9   | Atorvastatin 20mg (Lipitor)                                        | 2005 | Tablets     | Pharmacy                |                                                                                        | 2                         |
| 10  | Sibutramine 15 mg (Reductil)                                       | 2004 | Capsules    | Patient                 |                                                                                        | 2                         |
| 11  | Tadalafil 20mg (Cialis )                                           | 2004 | Tablets     | Patient I               |                                                                                        | 2                         |

\* Separate incidents of the same drug in the same year

1  
2  
3  
4  
5 **Substandard and falsified** medicines in the UK: A retrospective  
6  
7 **review of drug alerts (2001–2011)**  
8  
9

10  
11 Tariq Almuzaini<sup>1</sup>, Helen Sammons<sup>1</sup>, Imti Choonara<sup>1</sup>

12  
13 (1) Academic Division of Child Health, University of Nottingham, Derbyshire  
14 Children's Hospital, Derby, UK  
15  
16

17  
18  
19 **Corresponding author**

20  
21 Tariq Almuzaini

22  
23 Academic Division of Child Health

24  
25 The Medical School

26  
27 University of Nottingham

28  
29 Derbyshire Children's Hospital

30  
31 Uttoxeter Road

32  
33 Derby DE22 3DT

34  
35 UK

36  
37 Email: [mzxta@exmail.nottingham.ac.uk](mailto:mzxta@exmail.nottingham.ac.uk)  
38  
39

40  
41  
42 **Abstract:** 192 words

43  
44 **Full text:** 3526 words

45  
46 **Number of figures:** 2

47  
48 **Number of tables:** 3  
49

50  
51 **Keywords:** **Falsified**, substandard, defective, medicines  
52  
53  
54  
55  
56  
57  
58  
59  
60

## ABSTRACT

**Objective:** To determine the extent of **substandard and falsified** medicines in the UK.

**Design:** A retrospective review of drug alerts and company-led recalls.

**Setting:** The Medicines and Healthcare Products Regulatory Agency (MHRA) website search for drug alerts issued between 2001 and 2011.

**Eligibility criteria:** Drug alerts related to quality defect in medicinal products.

**Main outcome measure:** Relevant data about defective medicines reported in drug alerts and company-led recalls, including description of the defect, type of formulation, year of the alert and category of the alert.

**Results:** There were 280 substandard medicines of which 222 were recalled. The two most frequent problems were contamination (74 incidents) and issues related to packaging (98 incidents). Formulations for parenteral administration (117 incidents) were the formulation most frequently affected. There were 11 **falsified** medicines, **as defined by the MHRA**, reported over the 11 year period. The number of defective medicines reported by the MHRA increased tenfold from five in 2001 to 50 in 2011.

**Conclusions:** Substandard medicines are a significant problem in the UK. It is uncertain whether the increasing number of reports relates to improved detection or an increase in the number of substandard medicines.

### Article summary

#### Article focus

- To describe the pattern of drug alerts issued by the MHRA in the UK from 2001 to 2011.
- To determine the extent of substandard and **falsified** medicines in the UK.

## Key messages

- Substandard medicines are a significant problem in the UK, with a tenfold increase in the incidents reported over the last 10 years.
- Formulations for parenteral administration were most likely to be substandard.
- Education of healthcare professionals in the initial assessment of quality of medicines, especially parenteral formulation, is needed.

## Strengths and limitations of this study

### Strengths

- This is the first review to assess the problem of substandard and falsified medicines in a high income country.
- Quantification of all drug alerts issued by the MHRA over an 11-year period.

### Limitations

- Clinical significance of the problem is unknown due to the lack of available data from the MHRA or the manufacturers on the adverse events related to defective medicines.
- We were not able to determine the reason(s) for the rise of drug alerts, owing to the limited data available.

## INTRODUCTION

Falsified and substandard medicines are a significant problem throughout the world.<sup>1-4</sup> Most of the evidence for this has been reported from Africa and Asia in low and lower middle income countries.<sup>1-3</sup> Little evidence, however, is available for European and Northern American countries, as no individual studies about the problem have been published in high income countries. According to European commission data, the incidence of this problem in the European supply chain is growing by 10% to 20% annually.<sup>5,6</sup>

1  
2  
3 In the UK, the Medicines and Healthcare products Regulatory Agency (MHRA) has  
4 the responsibility of safeguarding the public from the risk of these drugs. The  
5 MHRA's Defective Medicines Report Centre (DMRC) is the department responsible  
6 for receiving and assessing reports about suspected defective drugs. Drug alerts are  
7 issued by the DMRC to the manufacturer, wholesalers and healthcare providers, in  
8 cases where a defective medicine is shown to compromise patients' safety.<sup>7</sup>  
9  
10  
11  
12

13  
14  
15 The aims of this study were to describe the number of drug alerts issued by the  
16 MHRA and to determine the extent of substandard and falsified medicines in the UK.  
17  
18

## 19 **METHODS**

20  
21 The DMRC defines a defective drug as a "drug which proves to be harmful under  
22 normal conditions of use, lacking in therapeutic efficacy and/or the qualitative and  
23 quantitative composition of a drug is not as declared. A drug can also be defective if  
24 the controls on a drug and/or on the ingredients and the controls at an intermediate  
25 stage of the manufacturing process have not been carried out or if some other  
26 requirement or obligation relating to the grant of the manufacturing authorisation has  
27 not been fulfilled."<sup>8</sup>  
28  
29  
30  
31  
32  
33

34  
35 There is currently no agreed international definition of a falsified medical product.  
36 The 2011 WHO definition of Substandard/spurious/false-labelled/falsified/  
37 counterfeit (SSFFC) medical products does not differentiate between different types  
38 of compromised medicines that need distinct regulatory actions.<sup>9</sup> Attaran and  
39 colleagues have proposed a clearer definition, differentiating between falsified and  
40 substandard medicines in relation to if a medicine is a public health crime, and  
41 therefore an intentional wrong doing, or if there has been a regulatory failure and no  
42 intentional wrong has taken place.<sup>4</sup> No specific definition exists within English law  
43 and the MHRA adopts the definition contained within the European Falsified  
44 Medicines Directive. They look for clear evidence that there was an intention to  
45 deceive a consumer, patient, healthcare professional and/or operator within the  
46 supply chain, into believing that the medical product being manufactured offered or  
47 supplied was the genuine article when in fact it was not.<sup>10</sup> In this paper we define  
48 medicines that failed to pass the quality measurements and standards set for them  
49  
50  
51  
52  
53  
54  
55  
56  
57  
58  
59  
60



1  
2  
3 as substandard medicines. On the other hand, falsified medicines are those which  
4 don't meet the quality specifications of regulatory authority with deliberate intent.  
5  
6  
7

8 A search for drug alerts related to defective medicinal products was carried out. This  
9 was performed through the official MHRA website using the section allocated for  
10 drug alerts. The first drug alert reported on the MHRA website was in the year 2001;  
11 thus, all drug alerts issued between 2001 and 2011 were included. Manufacturers  
12 can also voluntarily recall their defective products without the need for a drug alert to  
13 be issued by the MHRA in cases where defective medicines have left manufacturing  
14 sites but have had limited distribution in the supply chain. The MHRA started posting  
15 these recalls under its company-led recall section in 2011; hence, all these recalls  
16 were included. The resulting alerts and recalls were compiled and exclusion criteria  
17 included the following: drug alert replaced by another updated one, drug alert  
18 duplication, alert about clarification of medicine information, medical device alert and  
19 alert about medicines lacking efficacy or having significant toxicity.  
20  
21  
22  
23  
24  
25  
26  
27  
28

29 The following data was extracted from these alerts: name, strength and dosage form;  
30 year of the alert; number of affected batches; nature of the defect; class of drug alert  
31 and action to be taken about defective medicine. Substandard medicines were then  
32 subdivided according to the type of the defect into the following:  
33  
34  
35  
36  
37

- 38 ➤ **Contamination:** Defect related to microbial contaminations and issues  
39 related to sterility as well as chemical and particulate (i.e. impurities)  
40 contamination.  
41
- 42 ➤ **Minor packaging defect:** Defects that occur in relation to the printing of  
43 packaging materials, for instance, printed box errors that involve a missing  
44 or incorrect expiry date or batch number of a medicine. This also includes  
45 any errors in the patients' information leaflets (PIL) or summary of product  
46 characteristic.  
47
- 48 ➤ **Major packaging defects:** A defect that involves packing a medicine in a  
49 wrong box or carton or printing errors that involve missing or incorrect  
50 name or strength of a medicine.  
51
- 52 ➤ **Delivery:** A technical or physical defect such as broken capsules or  
53 leaking containers.  
54  
55  
56  
57  
58  
59  
60

- **Stability failure:** Defect results from the failure of the medicine to remain within the established standards throughout the expiration period, for example, low assay of the active ingredient prior to a product expiry.
- **Potency:** Failure of the medicine to evoke the desired effect within the stated strength.
- **Defect in active ingredient:** Defect results from the active ingredient being inadequate or excessive in the formulation.
- **Other defects:** Other deviations concerning non-compliance with good manufacturing practice at manufacturing site.

The total number of alerts was obtained and each individual medicine reported in these alerts was then extracted. Defective medicines were then classified according to the World Health Organization Anatomical Therapeutic Chemical (ATC) Classification System. This system uses five levels to classify medicines and the first two levels were used in this section. The first level classifies medicine according to the system or organ on which the medicine acts; whereas, the second level classifies medicine according to its main therapeutic group.<sup>11</sup>

Company-led recalls are initiated by manufacturers after consultation with the MHRA, without giving the recall any degree of urgency. Drug alerts, by contrast, are issued by the MHRA and have four possible classifications based on the level of the risk.<sup>8</sup> These classes are as follows:

- **Class 1 drug alert:** The defect in a medicine is life-threatening and poses a serious risk to patient health
- **Class 2 drug alert:** The defect in a medicine is not life-threatening but can still be harmful to patients
- **Class 3 drug alert:** The defect in a medicine is unlikely to be hazardous to patients, but an alert is issued, due to problems related to non-compliance with good manufacturing practices or marketing authorisations
- **Class 4 drug alert:** The least critical alert; advises “caution in use”.

1  
2  
3 Class 1, 2 and 3 drug alerts require recalls of affected batches, whereas class 4 alerts  
4 do not require recalls but require caution in dealing with defective medicines.<sup>8</sup>  
5  
6  
7

8 Three types of compromised medicine can be recognised in the alerts; namely:  
9 falsified, substandard and medicines withdrawn because of safety or toxicity concerns.  
10 The decision of which medicines were falsified was made from the MHRA  
11 classification.<sup>12</sup> Only medicines where it was made clear in the recall that the batch  
12 was regarded by the MHRA as counterfeit/falsified were given this label. No data was  
13 available to the authors to further analyse if the error was intentional or non-intentional.  
14 All alerts that were not included in the MHRAs specific falsified medical products list  
15 were therefore classified as substandard medicines.  
16  
17  
18  
19  
20  
21

## 22 RESULTS

### 23 Incident trends

24  
25  
26  
27  
28  
29 There were a total of 244 drug alerts issued by the MHRA. After applying the  
30 aforementioned exclusion criteria, 30 were excluded. In turn, 214 were deemed  
31 suitable for inclusion (Figure 1). Analysis showed that these alerts reported 269  
32 medicines, each of which represented an individual incident. The majority of these  
33 alerts were issued for individual medicines. However, some were issued for up to 14  
34 medicines.  
35  
36  
37  
38  
39

40  
41 Since MHRA started reporting drug alerts online in 2001, there has been a gradual  
42 increase in the rate of drug alerts related to defective medicinal products. The  
43 number of drug alerts increased from five in 2001 to 31 in 2011. The number of  
44 defective medicines reported by these alerts was five in 2001. This figure increased  
45 tenfold by 2011, to a total of 50 (Figure 2).  
46  
47  
48  
49

### 50 Defective medicines recalled by the MHRA under class 1, 2, 3, 4 drug alerts

51  
52 Seventeen medicines were recalled under class 1 drug alerts. The highest number of  
53 alerts was issued for contamination reasons. The most frequent formulations reported  
54 were formulations for parenteral administration, which accounted for seven cases.  
55  
56 The median time, when stated, taken by the MHRA to identify these medicines as  
57  
58  
59  
60

1  
2  
3 defective, from medicines being available on the market, to issuing alerts was 64 days  
4 (range 13-242 days). The length of this time period is critical, as the chance of  
5 adverse events increases as the time of exposure increases. Details of these alerts  
6 are shown in Table 1.  
7  
8

9  
10 Under a class 2 alert, 161 medicines were recalled. The main issues were related to  
11 contamination and minor packaging defects. There were also 87 medicines recalled  
12 under class 3 or 4 alerts ([online supplementary table 1](#)).  
13  
14

### 15 16 **Defective medicines recalled by Manufacturers (Company-led recalls)**

17  
18 It was observed that 19 company-led recalls were issued by the manufacturers in  
19 2011. One recall was excluded after applying the exclusion criteria. Thus, 18  
20 company-led recalls were included and these were issued for a total of 22 defective  
21 medicines (Figure 1).  
22  
23  
24

### 25 26 **Defective medicines, classified by type of defect**

27  
28 The incidents of defective medicines reported by the MHRA (269) were compiled  
29 with those reported by the manufacturers (22), which resulted in 291 incidents to be  
30 considered for further analysis.  
31  
32  
33

#### 34 35 **Substandard medicines:**

36  
37 Defects in substandard medicines accounted for the bulk of these incidents. Two  
38 hundred and eighty medicines (96%) were reported to be substandard (Figure 1). [A](#)  
39 [total of 222 medicines were recalled](#). The two most frequent problems, with the  
40 substandard medicines, were packaging and contamination (Table 2).  
41 [Contamination was a significant issue with parenteral formulations where there were](#)  
42 [a total of 60 incidents \(online supplementary table 2\)](#). Formulations for parenteral  
43 administration were most frequently affected by quality issues, with a total of 117  
44 incidents (42%). Formulations for intravenous administration accounted for the  
45 majority of the cases (89 incidents). Other formulations affected were subcutaneous  
46 (15 incidents) and intramuscular formulations (12 incidents).  
47  
48  
49  
50  
51  
52  
53

54  
55 Packaging defects were the other most frequent problem. In many cases these  
56 involved significant clinical issues such as incorrect name, strength or active  
57 ingredient of a medicine on the packaging or errors in the product information leaflet  
58  
59  
60

1  
2  
3 in relation to administration or toxicity. The number of defective medicines was  
4 highest amongst drugs that act on the nervous system (45/280), cardiovascular  
5 system (41) and infections (35). When these medicines were classified by  
6 therapeutic class, those most frequently reported defective were antihypertensives  
7 (27/280), antineoplastic agents (21/280) and antibacterials (19/280). Details are  
8 given in online supplementary table 3.  
9  
10  
11  
12

13  
14  
15 The UK Health and Social Care Information Centre published a list of the 20 drugs  
16 that contained the greatest number of items dispensed in 2011 by volume.<sup>13</sup> Ten of  
17 these 20 medicines were associated with a total of 22 incidents of substandard  
18 medicines.  
19  
20  
21

22  
23 The study identified 89 manufacturers, holding the marketing authorisation for 280  
24 medicines which were recalled by the MHRA. Manufacturers who held the marketing  
25 authorisation of 5 or more recalled medicines are listed in supplementary online table  
26 4. Fifteen manufacturers fit this criterion. Together, they hold the authorisation for  
27 163 medicines, accounting for 58% of all recalled medicines. The majority of these  
28 manufacturers have manufacturing facilities in the UK, four having headquarters in  
29 the UK (Glaxosmithkline, AstraZeneca, Martindale Pharmaceuticals and Karib Kemi  
30 Pharm). The supplementary online table 4 also describes individual manufacturing  
31 defects for all listed manufacturers.  
32  
33  
34  
35  
36  
37  
38

#### 39 Falsified medicines:

40  
41 Since 2004, 11 incidents of falsified drugs have been reported by the MHRA that  
42 breached the UK supply chain (Table 3). The last of these was reported in 2009. In  
43 2007 alone, the MHRA stated in its falsified medical products strategy (2012-2015)  
44 that more than 2 million doses of falsified medicines entered the supply chain.<sup>10</sup> A total  
45 of 700 000 doses were recalled from pharmacies or patients.<sup>10</sup> In these alerts,  
46 information regarding the actual problems with the falsified medicines is given for only  
47 two of the 11 incidents reported. In its recent strategy on falsified medicines, the  
48 MHRA stated that the previous falsified medicines seized had one or more quality  
49 defect issues concerning active ingredients, disintegration, dissolution or presence of  
50 unknown impurities.<sup>10</sup>  
51  
52  
53  
54  
55  
56  
57  
58  
59  
60

## DISCUSSION

This review has shown that the problem of defective medicines reported in the UK has increased tenfold over the eleven years studied. It is likely that the incidence of defective medicines has actually increased in the UK, but there is insufficient data to prove this. The most frequent formulations reported to be defective were the formulations for parenteral administration, which accounted for 42% of cases. Substandard medicines represented the bulk of defective medicine incidents, accounting for over 95% of the cases. Contamination issues were the most frequently reported clinically relevant problems reported; 80% of these contaminated formulations were formulations for parenteral administration. There is a greater likelihood of harm to the patient in association with contaminated parenteral formulations as highlighted by the recent outbreak of fungal sepsis in the USA.<sup>14</sup> However, these adverse health consequences have not been documented by the MHRA or the manufacturers.

### Substandard medicines

It is not clear whether the increase in the trend of substandard medicines incidents resulted from new legislation or strategies by the MHRA, that have made it easier to detect and report these drugs, or whether the rate of manufacture of substandard medicines in the UK is increasing. The overall performance of the MHRA has improved since it was officially launched in 2003.<sup>15, 16</sup> The introduction and development of the MHRA's website since 2003/04, as well as the addition of an integrated site for medicines and medical devices, opened important communication channels with healthcare providers and stakeholders.<sup>15</sup> The MHRA has introduced guidelines to healthcare professionals outlining procedures for reporting medicines suspected to be defective.<sup>8</sup> These guidelines outline the role that healthcare professionals play in the initial assessment of suspected defected medicines. They also illustrate subsequent investigations that can be carried out by the DMRC before it issues a drug alert. The ease of access to these guidelines through the MHRA's website may increase healthcare providers' awareness about how to deal with these drugs. It is now possible to report these drugs online or over the phone if the healthcare professional thinks that the defect in a drug may represent a serious risk to public health.

1  
2  
3 These developments may facilitate the reporting of defective drugs by health care  
4 providers or by manufacturers. In 2003/04, the DMRC received 298 reports about  
5 defective medicines.<sup>15</sup> The number of these reports has increased, totaling 830 in  
6 2010/11.<sup>16</sup> However the level of awareness of healthcare professionals about these  
7 drugs and how to report them has not been tested. For this reason, the possibility  
8 cannot be excluded that both the real incidence and the rate of manufacturing of  
9 poor quality medicines are increasing.  
10

11  
12  
13  
14  
15  
16 It was of concern that parenteral formulations for intravenous injection or infusion  
17 were the formulation most likely to be substandard. The risk of drug toxicity is far  
18 greater with drugs given intravenously than those given orally. The toxicity  
19 associated with substandard medicines worldwide is unknown.<sup>17</sup> Healthcare  
20 professionals should therefore be aware of the expected risk. Healthcare providers  
21 should be educated in the initial assessment of medicines, especially parenteral  
22 formulations, for any sign of impurity, particulate contamination, or improper sealing.  
23 If anything appears suspicious, the healthcare providers should know how to report  
24 this defect immediately to the DMRC before any further harm can occur.  
25  
26  
27  
28  
29  
30  
31

### 32 **Falsified medicines**

33  
34 The majority of **falsified** medicine incidents were reported by the MHRA in the period  
35 between 2004 and 2007. Information regarding the actual quality-defect type beyond  
36 authenticity has been stated for only two cases. Information on the other nine cases  
37 has been requested from the MHRA but has not been provided. Five incidents of  
38 **falsified** drugs were reported in 2007 alone. This led the MHRA to introduce its first  
39 anti-counterfeiting strategy in 2007.<sup>18</sup> The strategy outlined a 3-year plan to combat  
40 falsified medicines through a visionary program of communication, collaboration, and  
41 regulation. Since then, the MHRA has reported only one incident in 2009. This may  
42 be attributed to the effectiveness of this strategy in reducing the availability of these  
43 drugs in UK supply chains.  
44  
45  
46  
47  
48  
49  
50  
51

52  
53 The UK has a stringent regulatory oversight of the supply chain, which is  
54 represented by the few cases of falsified medicines reported over an 11-year period.  
55 Falsified medicines are frequently manufactured abroad and imported to the UK.<sup>10</sup>  
56 The criminal may choose the internet for distribution (given that it is less regulated).  
57  
58  
59  
60

1  
2  
3 Thus, the problem of drug counterfeiting is exacerbated by unregulated online  
4 pharmacies. Patients may use the Internet because of the following: the anonymity  
5 of the Internet, offering cheaper medications and receiving prescription-only drugs  
6 without prescription.<sup>19</sup> Falsified drugs do not comply with prerequisite quality and  
7 safety standards and therefore are hazardous to patients' health, being at best  
8 clinically ineffective and at worst can cause death. The public needs to be made  
9 aware of this risk. Adverse events of these drugs have been reported in different  
10 countries,<sup>20, 21</sup> including the UK.<sup>22</sup>

11  
12  
13  
14  
15  
16  
17  
18 Falsified medicines are criminal problem according the law enforcement agencies  
19 and a menace to public health. Falsified medicines are more likely if there is a weak  
20 regulatory system and supply chain. In order to tackle the issue of falsified  
21 medicines, a multisectoral approach is needed. This needs to involve law  
22 enforcement agencies alongside global public health stakeholders, from both public  
23 and private sectors, and the media.

### 24 25 26 27 28 29 30 **Pharmacovigilance**

31 Events caused by defective medicines are sometimes relatively difficult to distinguish  
32 from those considered to be the result of accidents, errors, or adverse drug  
33 reactions. An example is the fentanyl transdermal patch. Fentanyl is a strong opioid  
34 analgesic (about 80 times stronger than morphine) used to treat chronic pain.<sup>23</sup> It has  
35 a narrow therapeutic window, and an overdose can result in adverse effects,  
36 including respiratory arrest and death. Several deaths due to fentanyl patch  
37 overdose have been reported worldwide,<sup>24</sup> including the UK.<sup>25</sup> Overdoses can be  
38 caused by excessive application of patches, incorrect product use (e.g., cutting the  
39 patch), and exposing the patches or the skin to any kind of heat, which can  
40 dramatically increase the drug's absorption through the skin.<sup>24</sup> Certain fentanyl  
41 patches and transdermal systems have been recalled in different countries,<sup>26, 27</sup>  
42 including the UK (Table 1). The defects in all cases resulted from either a cut in one  
43 side of the fentanyl patch reservoir or self-activation of the transdermal system; both  
44 have the potential to cause overdose. In such cases, it can be difficult to distinguish  
45 between the events related to adverse drug reaction, misuse, or accidents, and  
46 those that are caused by defective products. There is a possibility, therefore, that  
47  
48  
49  
50  
51  
52  
53  
54  
55  
56  
57  
58  
59  
60



1  
2  
3 some cases of adverse events related to this defect have been attributed to the  
4 adverse-reaction nature of the drug and have gone unreported.  
5  
6

### 7 8 **Limitations**

9  
10 The main limitation of the review was the lack of available data on the adverse  
11 events related to defective medicines. The data has been not provided to the authors  
12 by the MHRA or the manufacturers. **A comparison between the expected risk and**  
13 **pharmacovigilance data could not be performed as pharmacovigilance reports in the**  
14 **UK are held by the MHRA and are not in the public domain.** Thus, the clinical  
15 significance of the problem is unknown. Company-led recalls have been posted on  
16 the MHRA website since 2011; information on these recalls for previous years has  
17 not been provided. Due to the lack of information made available, we were not able  
18 to determine the reason(s) for the rise in defective medicines.  
19  
20  
21  
22  
23  
24

### 25 26 **CONCLUSION**

27  
28 The reporting of substandard medicines in the UK is on the rise. There was an  
29 increase from five incidents in 2001 to 50 incidents in 2011. Parenteral formulations  
30 were most likely to be substandard. There is a greater likelihood of harm to the  
31 patient in association with contaminated parenteral formulations, but the clinical  
32 significance of the problem is unknown, due to the lack of information related to their  
33 toxicity. Healthcare providers should know how to assess the quality of medicines,  
34 particularly parenteral formulations for any sign that can be an indication of  
35 contamination and sterility failure.  
36  
37  
38  
39  
40  
41  
42

### 43 44 **Contributors:**

45  
46 TA performed the search, extracted the data and drafted the paper. HS double-  
47 checked the extracted data, conceived the idea and interpreted the results. IC had  
48 the original idea for the study. IC and TA designed the review and IC critically  
49 revised the manuscript and supervised the study. All authors approve of this final  
50 submitted version after their revision of the manuscript.  
51  
52  
53  
54

55  
56 **Competing interests:** None.  
57  
58  
59  
60

1  
2  
3  
4  
5  
6  
7  
8  
9  
10  
11  
12  
13  
14  
15  
16  
17  
18  
19  
20  
21  
22  
23  
24  
25  
26  
27  
28  
29  
30  
31  
32  
33  
34  
35  
36  
37  
38  
39  
40  
41  
42  
43  
44  
45  
46  
47  
48  
49  
50  
51  
52  
53  
54  
55  
56  
57  
58  
59  
60

**Funding:** This research received no specific grant from any funding agency in the public, commercial or not-for-profit sectors.

**Ethical approval:** Not required.

**Data sharing:** No additional data available.

For peer review only

## References

1. Bate R, Jensen P, Hess K, *et al.* Substandard and falsified anti-tuberculosis drugs: a preliminary field analysis. *Int J Tuberc Lung Dis* 2013;**17**(3):308-11.
2. Bate R, Coticelli P, Tren R, *et al.* Antimalarial drug quality in the most severely malarious parts of Africa – a six country study. *PLoS One* 2008;**3**:e2132.
3. Caudron JM, Ford N, Henkens M, *et al.* Substandard medicines in resource-poor settings: a problem that can no longer be ignored. *Trop Med Int Health* 2008;**13**(8):1062-1072.
4. Attaran A, Barry D, Basheer S, *et al.* How to achieve international action on falsified and substandard medicines. *BMJ* 2012;**345**:e7381.
5. European Commission. Policies to Combat Counterfeit Medicines, Contribution to Impact Assessment - 2008, London.  
[http://ec.europa.eu/health/files/counterf\\_par\\_trade/counterfeit-study-main-report\\_en.pdf](http://ec.europa.eu/health/files/counterf_par_trade/counterfeit-study-main-report_en.pdf) Accessed 30 January 2012.
6. Williams A. Europe prepares to battle the counterfeiters. *Pharmaceutical Technology Europe* 2011;**23**:9-11
7. MHRA. Defective Medicines Report Centre (2011).  
<http://www.mhra.gov.uk/Safetyinformation/Howwemonitorthesafetyofproducts/Medicines/DefectiveMedicinesReportCentre/index.htm> Accessed 30 January 2012.
8. MHRA. A Guide to Defective Medicinal Products.  
<http://www.mhra.gov.uk/home/groups/is-lic/documents/publication/con007572.pdf> Accessed 30 January 2012.
9. WHO. WHO's role in the prevention and control of medical products of compromised quality, safety and efficacy such as substandard/spurious/falsely-labelled/falsified/counterfeit medical products. 2011.  
[http://apps.who.int/gb/ssffc/pdf\\_files/A\\_SFFC\\_WG2\\_3-en.pdf](http://apps.who.int/gb/ssffc/pdf_files/A_SFFC_WG2_3-en.pdf). Accessed 1 June 2012.

- 1  
2  
3  
4  
5  
6  
7  
8  
9  
10  
11  
12  
13  
14  
15  
16  
17  
18  
19  
20  
21  
22  
23  
24  
25  
26  
27  
28  
29  
30  
31  
32  
33  
34  
35  
36  
37  
38  
39  
40  
41  
42  
43  
44  
45  
46  
47  
48  
49  
50  
51  
52  
53  
54  
55  
56  
57  
58  
59  
60
10. MHRA, Falsified Medical Products Strategy (2012-2015), .  
<http://www.mhra.gov.uk/home/groups/ei/documents/websiteresources/con149816.pdf>  
Accessed 15 October 2012.
11. WHOCC. ATC Structure and principles.  
[http://www.whooc.no/atc/structure\\_and\\_principles/](http://www.whooc.no/atc/structure_and_principles/) Accessed 30 January 2012.
12. MHRA, Counterfeit medicine recalls and previously seen counterfeits, .  
<http://www.mhra.gov.uk/Safetyinformation/Generalsafetyinformationandadvice/Adviceandinformationforconsumers/counterfeitmedicinesanddevices/FalsifiedMedicineRecallsandpreviouslyseencounterfeits/index.htm> Accessed 15 October 2012.
13. HSCIC, Prescriptions Dispensed in the Community, Statistics for England (2001-2011). <http://www.hscic.gov.uk/catalogue/PUB06941> Accessed 15 December 2012.
14. Davies E. More US citizens die from meningitis as scope of inquiry widens. *BMJ* 2012;**345**:e7095.
15. MHRA Annual Report and Accounts 2003/04.  
<http://www.mhra.gov.uk/home/groups/comms-ic/documents/websiteresources/con008340.pdf> Accessed 17 April 2012.
16. MHRA annual statistics 2010/11. <http://www.mhra.gov.uk/home/groups/comms-ic/documents/websiteresources/con123239.pdf> Accessed 17 April 2012.
17. Edwards IR. Fraudulent and substandard medicines. Getting Away with Murder? *Drug Saf* 2011;**34**:445-448.
18. MHRA. Anti-counterfeiting strategy 2007-2010.  
<http://www.mhra.gov.uk/home/groups/ei/documents/websiteresources/con2033156.pdf> Accessed 15 April 2012.
19. European Alliance for Access to Safe Medicines. The counterfeiting superhighway. 2008.  
[http://v35.pixelcms.com/ams/assets/312296678531/455\\_EAASM\\_counterfeiting%20report\\_020608.pdf](http://v35.pixelcms.com/ams/assets/312296678531/455_EAASM_counterfeiting%20report_020608.pdf) Accessed 5 May 2011.

- 1  
2  
3  
4  
5  
6  
7  
8  
9  
10  
11  
12  
13  
14  
15  
16  
17  
18  
19  
20  
21  
22  
23  
24  
25  
26  
27  
28  
29  
30  
31  
32  
33  
34  
35  
36  
37  
38  
39  
40  
41  
42  
43  
44  
45  
46  
47  
48  
49  
50  
51  
52  
53  
54  
55  
56  
57  
58  
59  
60
20. Solomon S. BC woman killed by fake drugs bought online: 'Metal toxicity' from counterfeit pills reinforces danger of Internet meds. *National Review of Medicine* 2007, [http://www.nationalreviewofmedicine.com/issue/2007/07\\_30/4\\_policy\\_politics\\_13.html](http://www.nationalreviewofmedicine.com/issue/2007/07_30/4_policy_politics_13.html) Accessed 15 December 2012.
  21. Chaubey S, Sangla K, Suthaharan E, *et al*. Severe hypoglycaemia associated with ingesting counterfeit medication. *Med J Aust* 2010;**192**(12):716-7.
  22. Barber T, Jacyna M. Acute lead intoxication from medications purchased online presenting with recurrent abdominal pain and encephalopathy. *J R Soc Med* 2011;**104**(3):120-3.
  23. Käferstein H, Sticht G. Comparison of nonradioactive microtiter plate enzyme immunoassays for the sensitive detection of fentanyl. *Forensic Sci Int* 2000;**113**(1-3):353-357.
  24. Jumbelic MI. Deaths with transdermal fentanyl patches. *Am J Forensic Med Pathol* 2010;**31**(1):18-21.
  25. MHRA. Fentanyl patches: serious and fatal overdose from dosing errors, accidental exposure, and inappropriate use. Drug Safety Update Sept 2008, vol 2 issue 2: 2.: <http://www.mhra.gov.uk/Safetyinformation/DrugSafetyUpdate/CON087796> Accessed 1 May 2011.
  26. FDA. . Duragesic (fentanyl transdermal system), class 1 recall notice. 2004. <http://www.fda.gov/Safety/MedWatch/SafetyInformation/SafetyAlertsforHumanMedicinalProducts/ucm166410.htm> Accessed 1 May 2011.
  27. Product Recalls Australia, fentanyl transdermal patches, 2005. . <http://www.recalls.gov.au/content/index.phtml/itemId/954146> Accessed 1 May 2011.

## Tables and figures:

Figure 1: Flow diagram of search and resulting alerts and recalls

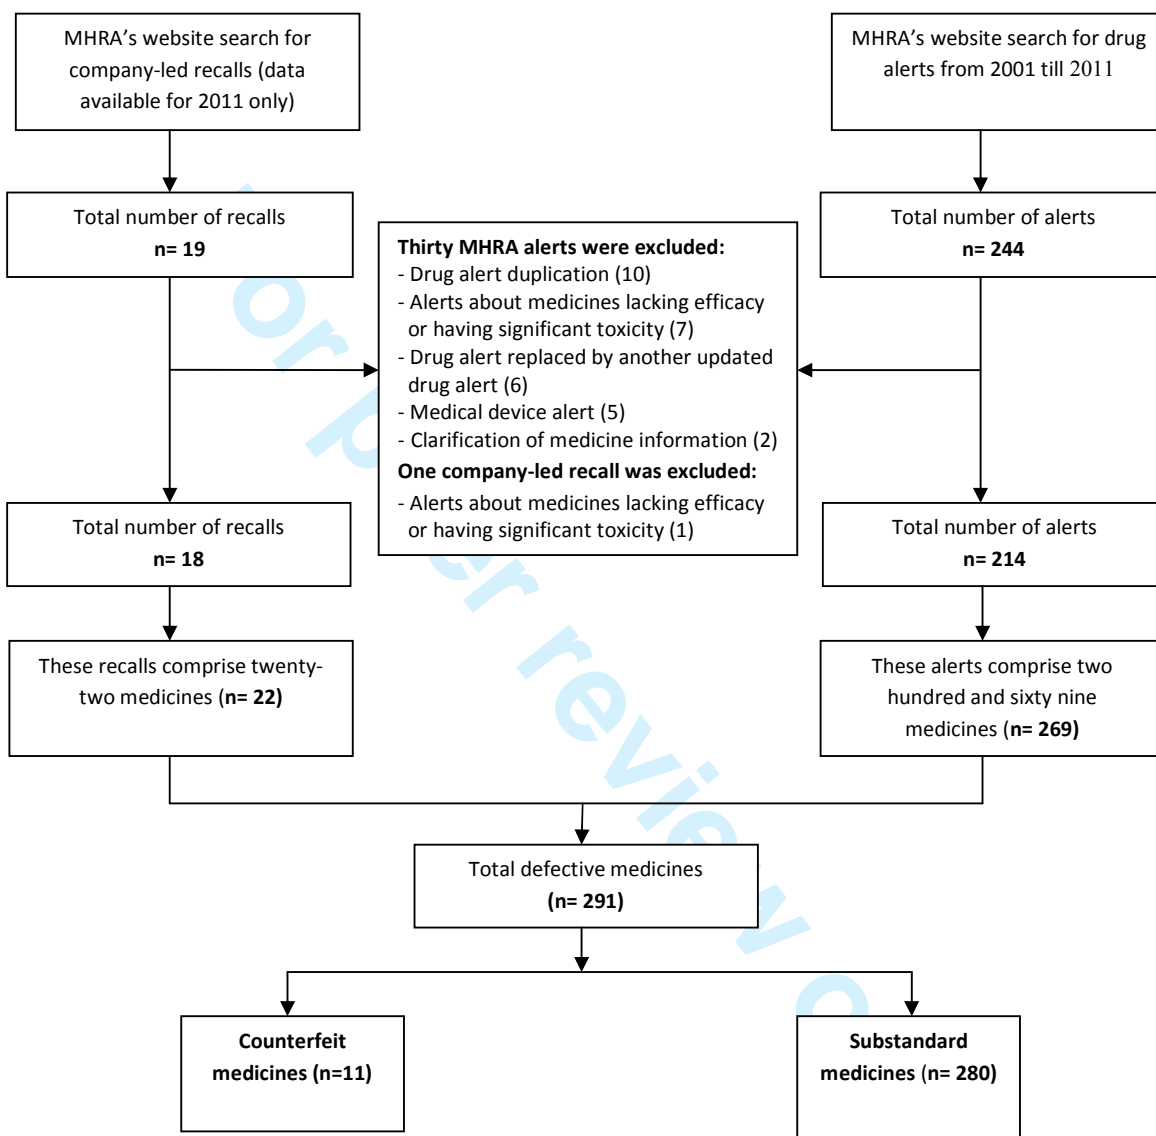

Figure 2: Number of drug alerts and defective medicines reported in the MHRA alerts from 2001 till 2011

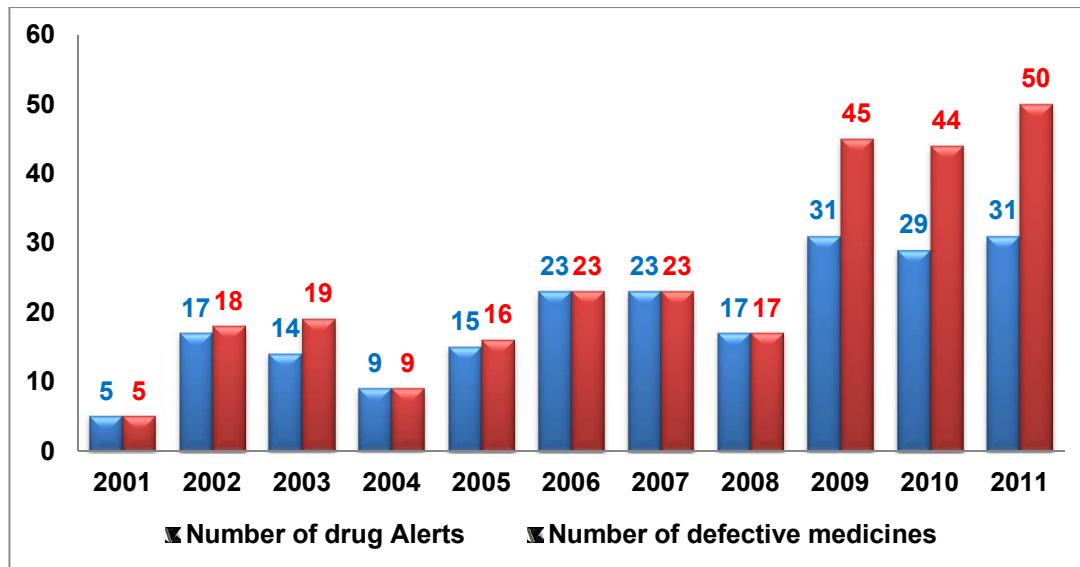

\*Some drug alerts reported more than one defective medicine.

Table 1: Substandard medicines recalled by the MHRA under class 1 drug alert

|                       | Type of defect                                      | Medications                    | Formulation                                                    | Defect description                                                                                             | Time taken for the MHRA to issue drug alerts from the first distribution of defective batches (In days) |
|-----------------------|-----------------------------------------------------|--------------------------------|----------------------------------------------------------------|----------------------------------------------------------------------------------------------------------------|---------------------------------------------------------------------------------------------------------|
| Substandard medicines | Contamination                                       | Zinc Oxide BP 15% w/w          | Local preparation                                              | Lack of sterility assurance                                                                                    | 19                                                                                                      |
|                       |                                                     | Etoposide 20 mg/ml             | Injection                                                      | Lack of sterility assurance                                                                                    | Not stated                                                                                              |
|                       |                                                     | Paclitaxel 6mg/ml              | Injection                                                      | Lack of sterility assurance                                                                                    | Not stated                                                                                              |
|                       |                                                     | Tetrofosmin 230 mcg            | Injection                                                      | Gas filters used in the aseptic manufacturing process were not sterile                                         | 33                                                                                                      |
|                       |                                                     | Rabies Vaccine                 | Injection                                                      | low level of contamination with live attenuated rabies virus                                                   | 64                                                                                                      |
|                       |                                                     | Nelfinavir mesilate            | All presentations                                              | Contaminated originator and parallel distributed product                                                       | Not stated                                                                                              |
|                       | Major packaging defects                             | Ibuprofen                      | Tablets                                                        | The product contained rogue quetiapine XL 50mg tablets and gabapentin 100mg capsules                           | 117                                                                                                     |
|                       |                                                     | Ephedrine Hydrochloride 3mg/ml | Injection                                                      | Ephedrine Hydrochloride syringe in a plastic box erroneously identified as Atropine Sulphate Injection         | 44                                                                                                      |
|                       |                                                     | Bendroflumethiazide 2.5 mg     | Tablets                                                        | This batch contains Warfarin 3 mg Tablets                                                                      | 210                                                                                                     |
|                       | Delivery issues                                     | Temozolomide*                  | Capsules                                                       | Reports of broken capsules and leakage                                                                         | 38                                                                                                      |
|                       |                                                     | Temozolomide*                  | Capsules                                                       | Reports of broken capsules and leakage                                                                         | 91                                                                                                      |
|                       |                                                     | Fentanyl (40 mcg per dose)     | Transdermal system                                             | One batch of the transdermal system have been found to self-activate which has the potential to cause overdose | Not stated                                                                                              |
|                       |                                                     | Salbutamol 100mcg              | Inhaler                                                        | Fault with the valve which may lead to higher doses                                                            | 120                                                                                                     |
|                       | Potency issues                                      | Fentanyl Compressed Lozenge    | Compressed Lozenge                                             | The potency of the product is out of specification                                                             | 242                                                                                                     |
|                       | Issues relating to active pharmaceutical ingredient | Oxybutynin Hydrochloride 5mg   | Tablets                                                        | Excessive amount of active ingredient                                                                          | 56                                                                                                      |
|                       |                                                     | Enoxaparin Sodium 20mg & 40mg  | Injection                                                      | Excessive amount of active ingredient                                                                          | 207                                                                                                     |
| Other issues          | Protamine sulphate 10mg/ml                          | Injection                      | Failure of the finished product to meet normal assay criteria. | 13                                                                                                             |                                                                                                         |

\*Two separate incidents.



Table 2: Substandard medicines

| Defect Type                  | Number of medicines | %   | Defect details                                                                           | Number of medicines |
|------------------------------|---------------------|-----|------------------------------------------------------------------------------------------|---------------------|
| Contamination                | 74                  | 27  | Impurities                                                                               | 44                  |
|                              |                     |     | Lack of sterility assurance                                                              | 18                  |
|                              |                     |     | Microbial contamination                                                                  | 12                  |
| Minor packaging defects      | 70                  | 25  | Failure to update PIL with administration or safety warning                              | 40                  |
|                              |                     |     | Incorrect information/ description of the dosage form, strength or dose of a medicine    | 12                  |
|                              |                     |     | Missing or packing PIL with the wrong carton                                             | 6                   |
|                              |                     |     | Others                                                                                   | 12                  |
| Delivery defects             | 33                  | 12  | Fault with a device                                                                      | 19                  |
|                              |                     |     | Leakage or loose seal                                                                    | 9                   |
|                              |                     |     | Others                                                                                   | 5                   |
| Major packaging defects      | 28                  | 10  | Missing or incorrect name ,strength, or active ingredient of a medicine on carton or box | 22                  |
|                              |                     |     | Packing a medicine in the wrong carton                                                   | 6                   |
| Stability defects            | 23                  | 8   | Unspecified stability failure                                                            | 15                  |
|                              |                     |     | Stability failure of the active ingredient or dissolution failure prior to expiry        | 8                   |
| Defects in active ingredient | 8                   | 3   | Active ingredient is out of specification ( either more or less)                         | 6                   |
|                              |                     |     | Non homogeneity of the active ingredient in the formulation                              | 2                   |
| Potency                      | 7                   | 2   | Sub-potent medicine (underlying causes of sub-potency were not stated)                   | 7                   |
| Other defects                | 37                  | 13  | GMP deficiencies at manufacturing site or improper storage of medicines during shipment  | 23                  |
|                              |                     |     | Others                                                                                   | 14                  |
| Total                        | 280                 | 100 |                                                                                          | 280                 |

**PIL:** Patient information leaflet; **GMP:** Good manufacturing practice

**Table 3: Drug alerts relating to falsified medicines**

| No. | Medicines                                                          | Year | Formulation | Recall level            | Stated problem/Defect description                                                      | Class of drug alert (1-4) |
|-----|--------------------------------------------------------------------|------|-------------|-------------------------|----------------------------------------------------------------------------------------|---------------------------|
| 1   | Salmeterol 25mcg /fluticasone propionate 250 mcg , ( Seretide 250) | 2009 | Evohaler    | Pharmacy and wholesaler | A reduced patient dose                                                                 | 2                         |
| 2   | Sensodyne Original and Sensodyne Mint in 50ml tubes                | 2007 | Toothpaste  | Caution                 | Counterfeit toothpaste contains Diethylene Glycol ( nephrotoxic and neurotoxic poison) | 4                         |
| 3   | Clopidogrel 75 mg (Plavix)*                                        | 2007 | Tablets     | Pharmacy                | Not likely to pose an immediate risk to patients. (Parallel imported product)          | 1                         |
| 4   | Bicalutamide 50mg (Casodex)                                        | 2007 | Tablets     | Patient                 |                                                                                        | 1                         |
| 5   | Clopidogrel 75 mg (Plavix)*                                        | 2007 | Tablets     | Pharmacy                |                                                                                        | 1                         |
| 6   | Olanzapine 10mg (Zyprexa)                                          | 2007 | Tablets     | Patient                 |                                                                                        | 1                         |
| 7   | Atorvastatin 20mg (Lipitor)*                                       | 2006 | Tablets     | Pharmacy                |                                                                                        | 2                         |
| 8   | Atorvastatin 20mg (Lipitor)*                                       | 2006 | Tablets     | Pharmacy                |                                                                                        | 2                         |
| 9   | Atorvastatin 20mg (Lipitor)                                        | 2005 | Tablets     | Pharmacy                |                                                                                        | 2                         |
| 10  | Sibutramine 15 mg (Reductil)                                       | 2004 | Capsules    | Patient                 |                                                                                        | 2                         |
| 11  | Tadalafil 20mg (Cialis )                                           | 2004 | Tablets     | Patient I               |                                                                                        | 2                         |

\* Separate incidents of the same drug in the same year

**Supplementary data****Table 1: Defective medicines under class 2, 3 and 4 drug alerts**

|                       | Type of defect                                      | Number of medications recalled under class 2 alert | Number of medications recalled under class 3 alert | Number of medications under class 4 alert | Company-led recalls |
|-----------------------|-----------------------------------------------------|----------------------------------------------------|----------------------------------------------------|-------------------------------------------|---------------------|
| Substandard medicines | Contamination                                       | 40                                                 | 9                                                  | 7                                         | 11                  |
|                       | Major packaging defects                             | 7                                                  | 5                                                  | 14                                        | 0                   |
|                       | Minor packaging defects                             | 40                                                 | 9                                                  | 22                                        | 1                   |
|                       | Delivery issues                                     | 17                                                 | 3                                                  | 4                                         | 5                   |
|                       | Stability failure                                   | 11                                                 | 12                                                 | 0                                         | 0                   |
|                       | Potency issues                                      | 5                                                  | 0                                                  | 0                                         | 2                   |
|                       | Issues relating to active pharmaceutical ingredient | 4                                                  | 1                                                  | 0                                         | 1                   |
|                       | Other issues                                        | 33                                                 | 0                                                  | 0                                         | 2                   |
| Counterfeit medicines | Counterfeit medicines                               | 4                                                  | 0                                                  | 1                                         | 0                   |
| <b>Total</b>          |                                                     | <b>161</b>                                         | <b>39</b>                                          | <b>48</b>                                 | <b>22*</b>          |

\* All company-led recalls were issued by manufacturers in 2011

**Table 2: Substandard parenteral formulations**

| Defect Type                 | Intravenous | Subcutaneous | Intramuscular | Intravitreal | Total      |
|-----------------------------|-------------|--------------|---------------|--------------|------------|
| Contamination               | 48          | 6            | 6             | 0            | 60         |
| Minor packaging defect      | 16          | 2            | 0             | 0            | 18         |
| Delivery defect             | 9           | 4            | 0             | 1            | 14         |
| Major packaging defects     | 9           | 0            | 0             | 0            | 9          |
| Stability defect            | 2           | 1            | 1             | 0            | 4          |
| Defect in active ingredient | 0           | 1            | 0             | 0            | 1          |
| Potency                     | 2           | 0            | 3             | 0            | 5          |
| Other defects               | 3           | 1            | 2             | 0            | 6          |
| <b>Total</b>                | <b>89</b>   | <b>15</b>    | <b>12</b>     | <b>1</b>     | <b>117</b> |

**Table 3: Substandard medicines reported by the MHRA, classified according to the organ or system in which they act and according to the therapeutic subgroup they belong (ATC Classification) 2001-2011:**

| Category                                                            | No. | %    | Category                                                                                                                                                 | No.                       | %                               |
|---------------------------------------------------------------------|-----|------|----------------------------------------------------------------------------------------------------------------------------------------------------------|---------------------------|---------------------------------|
| According to organ or system in which the drug acts                 |     |      | According to subgroup, therapeutic main group                                                                                                            |                           |                                 |
| Nervous system                                                      | 45  | 16.1 | Psychoanaleptics<br>Psycholeptics<br>Analgesics<br>Antiepileptics<br>Anaesthetics                                                                        | 12<br>11<br>10<br>10<br>2 | 4.3<br>4.0<br>3.6<br>3.6<br>0.7 |
| Cardiovascular System                                               | 41  | 14.6 | Antihypertensives<br>Cardiac therapy<br>Lipid modifying agents                                                                                           | 27<br>11<br>3             | 9.6<br>4.0<br>1.1               |
| Anti-infectives for systemic use                                    | 35  | 12.5 | Antibacterials for systemic use<br>Vaccines<br>Antivirals for systemic use<br>Antimycotics for systemic use                                              | 19<br>9<br>4<br>3         | 6.8<br>3.2<br>1.4<br>1.1        |
| Blood and blood forming organs                                      | 30  | 10.7 | Blood substitutes and perfusion solutions<br>Antithrombotic agents<br>Antianemic preparations                                                            | 18<br>9<br>3              | 6.4<br>3.2<br>1.1               |
| Alimentary tract and metabolism                                     | 29  | 10.3 | Drugs for acid related disorders<br>Drugs for functional gastrointestinal disorders<br>Drugs used in diabetes<br>Vitamins<br>Stomatological preparations | 10<br>9<br>5<br>4<br>1    | 3.6<br>3.2<br>1.8<br>1.4<br>0.3 |
| Antineoplastic and immunomodulating agents                          | 29  | 10.3 | Antineoplastic agents<br>Immunostimulants<br>Endocrine therapy<br>Immunosuppressants                                                                     | 21<br>5<br>2<br>1         | 7.5<br>1.8<br>0.7<br>0.3        |
| Respiratory system                                                  | 15  | 5.4  | Drugs for obstructive airway diseases<br>Throat preparations<br>Antihistamines for systemic use<br>Nasal preparations                                    | 11<br>2<br>1<br>1         | 4.0<br>0.7<br>0.3<br>0.3        |
| Genito-urinary system and sex hormones                              | 13  | 4.6  | Sex hormones and modulators of the genital system<br>Urologicals<br>Gynecological antiinfectives and antiseptics                                         | 6<br>5<br>2               | 2.2<br>1.8<br>0.7               |
| Sensory organs                                                      | 12  | 4.3  | Ophthalmologicals<br>Otolologicals                                                                                                                       | 11<br>1                   | 4.0<br>0.3                      |
| Various                                                             | 12  | 4.3  | All other therapeutic products<br>General nutrients<br>Diagnostic radiopharmaceuticals                                                                   | 5<br>4<br>3               | 1.8<br>1.4<br>1.1               |
| Musculo-skeletal system                                             | 10  | 3.6  | Antiinflammatory and antirheumatic products<br>Muscle relaxants                                                                                          | 8<br>2                    | 3.0<br>0.7                      |
| Systemic hormonal preparations, excluding sex hormones and insulins | 8   | 2.9  | Corticosteroids for systemic use<br>Thyroid therapy<br>Pituitary and hypothalamic hormones and analogues<br>Pancreatic hormones                          | 4<br>2<br>1<br>1          | 1.4<br>0.7<br>0.3<br>0.3        |
| Dermatologicals                                                     | 1   | 0.4  | Corticosteroids, dermatological preparations                                                                                                             | 1                         | 0.3                             |
| Total                                                               | 280 | 100  | Total                                                                                                                                                    | 280                       | 100                             |

Table 4: Substandard medicines categorised by manufacturer and type of defects

| No. | Pharmaceutical company          | Type of defect |               |                 |                   |                 |          |         |        | Total | Area served (Headquarter) | Manufacturing facility in the UK (Yes/No) |
|-----|---------------------------------|----------------|---------------|-----------------|-------------------|-----------------|----------|---------|--------|-------|---------------------------|-------------------------------------------|
|     |                                 | Stability      | Contamination | Minor packaging | Active ingredient | Major packaging | Delivery | Potency | Others |       |                           |                                           |
| 1   | Baxter Healthcare               | 0              | 14            | 1               | 0                 | 0               | 5        | 0       | 0      | 20    | Worldwide (USA)           | Yes                                       |
| 2   | Sanofi Aventis                  | 1              | 5             | 3               | 1                 | 3               | 0        | 2       | 3      | 15    | Worldwide (France)        | Yes                                       |
| 3   | Pfizer                          | 0              | 1             | 10              | 0                 | 0               | 2        | 0       | 1      | 14    | Worldwide (USA)           | Yes                                       |
| 4   | Martindale Pharmaceuticals      | 0              | 2             | 1               | 0                 | 10              | 1        | 0       | 0      | 14    | UK (UK)                   | Yes                                       |
| 5   | Glaxosmithkline                 | 1              | 2             | 5               | 2                 | 0               | 0        | 0       | 3      | 13    | Worldwide (UK)            | Yes                                       |
| 6   | Novartis                        | 1              | 3             | 5               | 0                 | 0               | 1        | 0       | 1      | 11    | Worldwide (Switzerland)   | Yes                                       |
| 7   | Merck Sharp & Dohme             | 3              | 1             | 5               | 0                 | 2               | 0        | 0       | 0      | 11    | Worldwide (USA)           | Yes                                       |
| 8   | Janssen                         | 2              | 4             | 2               | 0                 | 0               | 1        | 1       | 0      | 10    | Worldwide (Belgium)       | No                                        |
| 9   | TEVA                            | 4              | 1             | 2               | 0                 | 1               | 0        | 1       | 1      | 10    | Worldwide (Israel)        | Yes                                       |
| 10  | AstraZeneca                     | 1              | 0             | 3               | 0                 | 1               | 4        | 0       | 0      | 9     | Worldwide (UK)            | Yes                                       |
| 11  | Sandoz (subsidiary of Novartis) | 0              | 3             | 0               | 0                 | 0               | 2        | 0       | 4      | 9     | Worldwide (Switzerland)   | Yes                                       |
| 12  | Karib Kemi Pharm                | 0              | 0             | 0               | 0                 | 0               | 0        | 0       | 9      | 9     | Europe (UK)               | Yes                                       |
| 13  | Ranbaxy                         | 0              | 0             | 7               | 0                 | 0               | 0        | 0       | 1      | 8     | Worldwide (India)         | No                                        |
| 14  | Roche                           | 0              | 3             | 1               | 0                 | 0               | 0        | 1       | 0      | 5     | Worldwide (Switzerland)   | No                                        |
| 15  | FDC limited                     | 0              | 0             | 0               | 0                 | 0               | 5        | 0       | 0      | 5     | Worldwide (India)         | No                                        |
|     |                                 |                |               |                 |                   |                 |          |         |        | 163   |                           |                                           |

1  
2  
3  
4  
5  
6  
7  
8  
9  
10  
11  
12  
13  
14  
15  
16  
17  
18  
19  
20  
21  
22  
23  
24  
25  
26  
27  
28  
29  
30  
31  
32  
33  
34  
35  
36  
37  
38  
39  
40  
41  
42  
43  
44  
45  
46  
47  
48  
49  
50  
51  
52  
53  
54  
55  
56  
57  
58  
59  
60

**Figure 1: Flow diagram of search and resulting alerts and recalls**

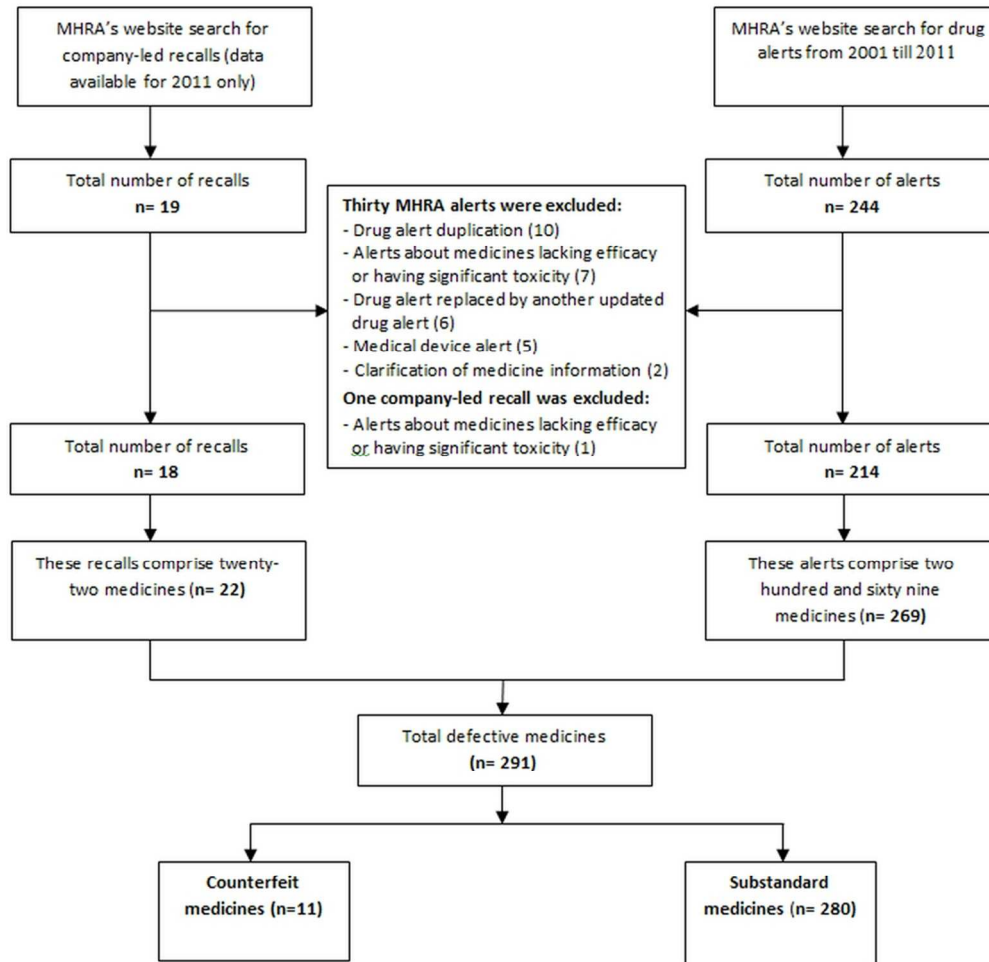

90x94mm (300 x 300 DPI)

Figure 2: Number of drug alerts and defective medicines reported in the MHRA alerts from 2001 till 2011

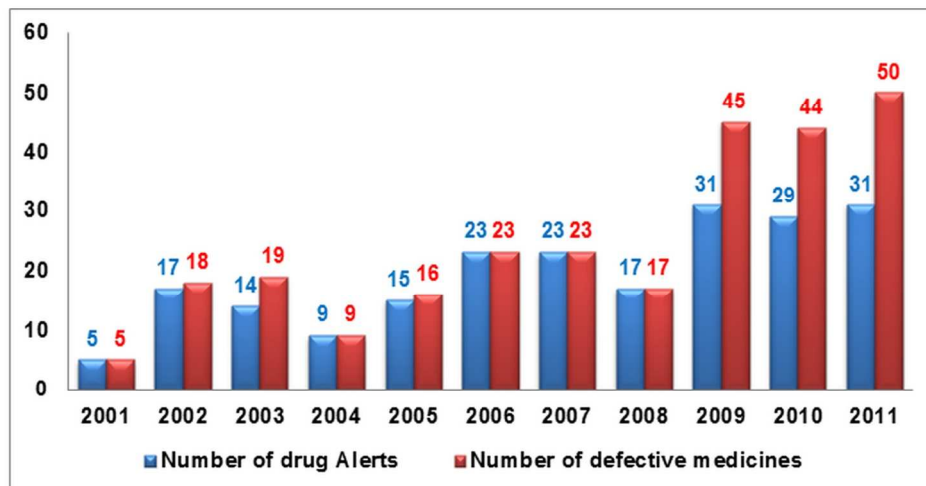

\*Some drug alerts reported more than one defective medicine.

134x90mm (300 x 300 DPI)

Review only

1  
2  
3  
4  
5  
6  
7  
8  
9  
10  
11  
12  
13  
14  
15  
16  
17  
18  
19  
20  
21  
22  
23  
24  
25  
26  
27  
28  
29  
30  
31  
32  
33  
34  
35  
36  
37  
38  
39  
40  
41  
42  
43  
44  
45  
46  
47  
48  
49  
50  
51  
52  
53  
54  
55  
56  
57  
58  
59  
60
